# Supplementary material
Source: PubMed Central journal article supplement (PMC9708089)
Supplement: mmc1.pdf [file mmc1.pdf]

# THE LANCET

## Respiratory Medicine

### Supplementary appendix

This appendix formed part of the original submission and has been peer reviewed. We post it as supplied by the authors.

Supplement to: Reddy MP, Subramaniam A, Chua C, et al. Respiratory system mechanics, gas exchange, and outcomes in mechanically ventilated patients with COVID-19-related acute respiratory distress syndrome: a systematic review and meta-analysis. *Lancet Respir Med* 2022; published online Nov 3. [https://doi.org/10.1016/S2213-2600\(22\)00393-9](https://doi.org/10.1016/S2213-2600(22)00393-9).

# A systematic review and meta-analysis of respiratory system mechanics, gas exchange and outcomes in mechanically ventilated patients with COVID-19 related acute respiratory distress syndrome

Mallikarjuna PONNAPA REDDY, Ashwin SUBRAMANIAM, Clara CHUA, Ryan Ruiyang LING, Christopher ANSTEY, Kollengode RAMANATHAN, Arthur S. SLUTSKY, Kiran SHEKAR

## Supplementary Material

| Legends for Supplementary Tables and Figures                                                                                                                                                                         | Page number |
|----------------------------------------------------------------------------------------------------------------------------------------------------------------------------------------------------------------------|-------------|
| <b>Figure S1:</b> Preferred reporting items for systematic reviews and meta-analyses checklist.                                                                                                                      | 2           |
| <b>Figure S2:</b> Box-Whisker plot for (A) compliance; (B) PaCO <sub>2</sub> , (C) Tidal volume and (D) positive end-expiratory pressure.                                                                            | 4           |
| <b>Figure S3:</b> Forest plot demonstrating pooled compliance in all patients with coronavirus disease 2019 acute respiratory distress syndrome.                                                                     | 5           |
| <b>Figure S4:</b> Funnel plot for the primary analysis pooling the compliance among all studies.                                                                                                                     | 6           |
| <b>Figure S5:</b> Forest plot comparing compliance with PaCO <sub>2</sub> .                                                                                                                                          | 7           |
| <b>Figure S6:</b> Forest plot comparing compliance with PEEP.                                                                                                                                                        | 8           |
| <b>Figure S7:</b> Univariable Meta-regression Analysis for COVID-19-ARDS studies by (A) PaO <sub>2</sub> /FiO <sub>2</sub> (B) tidal volume (C) PEEP (D) Driving pressure (E) PaCO <sub>2</sub> (F) Body Mass Index. | 9           |
| <b>Figure S8:</b> Post hoc analysis: Sensitivity analysis using fixed effect model.                                                                                                                                  | 10          |
| <b>Table S1:</b> Search strategy used in this review for Medline database.                                                                                                                                           | 11          |
| <b>Table S2:</b> Data collection template.                                                                                                                                                                           | 12          |
| <b>Table S3:</b> Modified Newcastle Ottawa (mNOS) scores for all included studies.                                                                                                                                   | 13          |
| <b>Table S4:</b> Grading of Recommendations, Assessment, Development and Evaluations summary of findings table.                                                                                                      | 14          |
| <b>Table S5:</b> References for the studies included in this systematic review.                                                                                                                                      | 16          |
| <b>Table S6:</b> Demographic data for patients with COVID-19-ARDS– Unselected population (S6a) and Selected population (S6b).                                                                                        | 18          |
| <b>Table S7:</b> Ventilator parameters and respiratory variables.                                                                                                                                                    | 21          |
| <b>Table S8:</b> Secondary outcomes for patients with coronavirus disease 2019 acute respiratory distress syndrome.                                                                                                  | 24          |
| <b>Table S9:</b> Outcomes of all included studies.                                                                                                                                                                   | 25          |
| <b>Table S10:</b> Sensitivity analysis based on sample size.                                                                                                                                                         | 29          |
| <b>Table S11:</b> Landmark ARDS clinical trials from the pre-COVID period.                                                                                                                                           | 30          |
| <b>References</b>                                                                                                                                                                                                    | 31          |

**Figure S1: Preferred reporting items for systematic reviews and meta-analyses checklist**

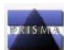

PRISMA 2020 Checklist

| Section and Topic             | Item #                                                                                       | Checklist item                                                                                                                                                                                                                                                                                       | Location where item is reported |
|-------------------------------|----------------------------------------------------------------------------------------------|------------------------------------------------------------------------------------------------------------------------------------------------------------------------------------------------------------------------------------------------------------------------------------------------------|---------------------------------|
| <b>TITLE</b>                  |                                                                                              |                                                                                                                                                                                                                                                                                                      |                                 |
| Title                         | 1                                                                                            | Identify the report as a systematic review.                                                                                                                                                                                                                                                          | Page 1                          |
| <b>ABSTRACT</b>               |                                                                                              |                                                                                                                                                                                                                                                                                                      |                                 |
| Abstract                      | 2                                                                                            | See the PRISMA 2020 for Abstracts checklist.                                                                                                                                                                                                                                                         | Page 2                          |
| <b>INTRODUCTION</b>           |                                                                                              |                                                                                                                                                                                                                                                                                                      |                                 |
| Rationale                     | 3                                                                                            | Describe the rationale for the review in the context of existing knowledge.                                                                                                                                                                                                                          | Page 4                          |
| Objectives                    | 4                                                                                            | Provide an explicit statement of the objective(s) or question(s) the review addresses.                                                                                                                                                                                                               | Page 5                          |
| <b>METHODS</b>                |                                                                                              |                                                                                                                                                                                                                                                                                                      |                                 |
| Eligibility criteria          | 5                                                                                            | Specify the inclusion and exclusion criteria for the review and how studies were grouped for the syntheses.                                                                                                                                                                                          | Page 6                          |
| Information sources           | 6                                                                                            | Specify all databases, registers, websites, organisations, reference lists and other sources searched or consulted to identify studies. Specify the date when each source was last searched or consulted.                                                                                            | Page 5                          |
| Search strategy               | 7                                                                                            | Present the full search strategies for all databases, registers and websites, including any filters and limits used.                                                                                                                                                                                 | Page 5<br>Table S1              |
| Selection process             | 8                                                                                            | Specify the methods used to decide whether a study met the inclusion criteria of the review, including how many reviewers screened each record and each report retrieved, whether they worked independently, and if applicable, details of automation tools used in the process.                     | Page 6                          |
| Data collection process       | 9                                                                                            | Specify the methods used to collect data from reports, including how many reviewers collected data from each report, whether they worked independently, any processes for obtaining or confirming data from study investigators, and if applicable, details of automation tools used in the process. | Page 6                          |
| Data items                    | 10a                                                                                          | List and define all outcomes for which data were sought. Specify whether all results that were compatible with each outcome domain in each study were sought (e.g. for all measures, time points, analyses), and if not, the methods used to decide which results to collect.                        | Page 6                          |
|                               | 10b                                                                                          | List and define all other variables for which data were sought (e.g. participant and intervention characteristics, funding sources). Describe any assumptions made about any missing or unclear information.                                                                                         | Page 6                          |
| Study risk of bias assessment | 11                                                                                           | Specify the methods used to assess risk of bias in the included studies, including details of the tool(s) used, how many reviewers assessed each study and whether they worked independently, and if applicable, details of automation tools used in the process.                                    | Page 6                          |
| Effect measures               | 12                                                                                           | Specify for each outcome the effect measure(s) (e.g. risk ratio, mean difference) used in the synthesis or presentation of results.                                                                                                                                                                  | Page 6,<br>7                    |
| Synthesis methods             | 13a                                                                                          | Describe the processes used to decide which studies were eligible for each synthesis (e.g. tabulating the study intervention characteristics and comparing against the planned groups for each synthesis (item #5)).                                                                                 | N/A                             |
|                               | 13b                                                                                          | Describe any methods required to prepare the data for presentation or synthesis, such as handling of missing summary statistics, or data conversions.                                                                                                                                                | Page 7                          |
|                               | 13c                                                                                          | Describe any methods used to tabulate or visually display results of individual studies and syntheses.                                                                                                                                                                                               | Page 7                          |
|                               | 13d                                                                                          | Describe any methods used to synthesize results and provide a rationale for the choice(s). If meta-analysis was performed, describe the model(s), method(s) to identify the presence and extent of statistical heterogeneity, and software package(s) used.                                          | Page 7                          |
|                               | 13e                                                                                          | Describe any methods used to explore possible causes of heterogeneity among study results (e.g. subgroup analysis, meta-regression).                                                                                                                                                                 | Page 7                          |
| 13f                           | Describe any sensitivity analyses conducted to assess robustness of the synthesized results. | Page 7                                                                                                                                                                                                                                                                                               |                                 |
| Reporting bias                | 14                                                                                           | Describe any methods used to assess risk of bias due to missing results in a synthesis (arising from reporting biases).                                                                                                                                                                              | Page 7                          |
| <b>assessment</b>             |                                                                                              |                                                                                                                                                                                                                                                                                                      |                                 |
| Certainty assessment          | 15                                                                                           | Describe any methods used to assess certainty (or confidence) in the body of evidence for an outcome.                                                                                                                                                                                                | Page 7                          |
| <b>RESULTS</b>                |                                                                                              |                                                                                                                                                                                                                                                                                                      |                                 |
| Study selection               | 16a                                                                                          | Describe the results of the search and selection process, from the number of records identified in the search to the number of studies included in the review, ideally using a flow diagram.                                                                                                         | Page 8                          |
|                               | 16b                                                                                          | Cite studies that might appear to meet the inclusion criteria, but which were excluded, and explain why they were excluded.                                                                                                                                                                          | Page 8,<br>Figure S2            |
| Study characteristics         | 17                                                                                           | Cite each included study and present its characteristics.                                                                                                                                                                                                                                            | Page 8<br>Table 1,<br>S4        |
| Risk of bias in studies       | 18                                                                                           | Present assessments of risk of bias for each included study.                                                                                                                                                                                                                                         | Page 8<br>Table S2              |
| Results of individual studies | 19                                                                                           | For all outcomes, present, for each study: (a) summary statistics for each group (where appropriate) and (b) an effect estimate and its precision (e.g. confidence/credible interval), ideally using structured tables or plots.                                                                     | N/A                             |
| Results of syntheses          | 20a                                                                                          | For each synthesis, briefly summarise the characteristics and risk of bias among contributing studies.                                                                                                                                                                                               | Page 8                          |
|                               | 20b                                                                                          | Present results of all statistical syntheses conducted. If meta-analysis was done, present for each the summary estimate and its precision (e.g. confidence/credible interval) and measures of statistical heterogeneity. If comparing groups, describe the direction of the effect.                 | Page 8                          |
|                               | 20c                                                                                          | Present results of all investigations of possible causes of heterogeneity among study results.                                                                                                                                                                                                       | Page 8                          |
|                               | 20d                                                                                          | Present results of all sensitivity analyses conducted to assess the robustness of the synthesized results.                                                                                                                                                                                           | Page 10                         |
| Reporting biases              | 21                                                                                           | Present assessments of risk of bias due to missing results (arising from reporting biases) for each synthesis assessed.                                                                                                                                                                              | Page 10                         |
| Certainty of evidence         | 22                                                                                           | Present assessments of certainty (or confidence) in the body of evidence for each outcome assessed.                                                                                                                                                                                                  | Page 10<br>Table S3             |
| <b>DISCUSSION</b>             |                                                                                              |                                                                                                                                                                                                                                                                                                      |                                 |
| Discussion                    | 23a                                                                                          | Provide a general interpretation of the results in the context of other evidence.                                                                                                                                                                                                                    | Page 10                         |
|                               | 23b                                                                                          | Discuss any limitations of the evidence included in the review.                                                                                                                                                                                                                                      | Page 13                         |
|                               | 23c                                                                                          | Discuss any limitations of the review processes used.                                                                                                                                                                                                                                                | Page 13                         |
|                               | 23d                                                                                          | Discuss implications of the results for practice, policy, and future research.                                                                                                                                                                                                                       | Page 14                         |
| <b>OTHER INFORMATION</b>      |                                                                                              |                                                                                                                                                                                                                                                                                                      |                                 |
| Registration and protocol     | 24a                                                                                          | Provide registration information for the review, including register name and registration number, or state that the review was not registered.                                                                                                                                                       | Page 1,3                        |
|                               | 24b                                                                                          | Indicate where the review protocol can be accessed, or state that a protocol was not prepared.                                                                                                                                                                                                       | Page 1,3                        |
|                               | 24c                                                                                          | Describe and explain any amendments to information provided at registration or in the protocol.                                                                                                                                                                                                      | Page 7,9                        |

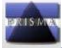

PRISMA 2020 Checklist

| Section and Topic                              | Item # | Checklist item                                                                                                                                                                                                                             | Location where item is reported |
|------------------------------------------------|--------|--------------------------------------------------------------------------------------------------------------------------------------------------------------------------------------------------------------------------------------------|---------------------------------|
| Support                                        | 25     | Describe sources of financial or non-financial support for the review, and the role of the funders or sponsors in the review.                                                                                                              | Page 15                         |
| Competing interests                            | 26     | Declare any competing interests of review authors.                                                                                                                                                                                         | Page 15                         |
| Availability of data, code and other materials | 27     | Report which of the following are publicly available and where they can be found: template data collection forms; data extracted from included studies; data used for all analyses; analytic code; any other materials used in the review. | Page 15                         |

From: Page MJ, McKenzie JE, Bossuyt PM, Boutron I, Hoffmann TC, Mulrow CD, et al. The PRISMA 2020 statement: an updated guideline for reporting systematic reviews. *BMJ* 2021;372:n71. doi: 10.1136/bmj.n71  
For more information, visit: <http://www.prisma-statement.org/>

**Figure S2:** Box-Whisker plot for (A) compliance; (B) PaCO<sub>2</sub>, (C) Tidal volume and (D) positive end-expiratory pressure.

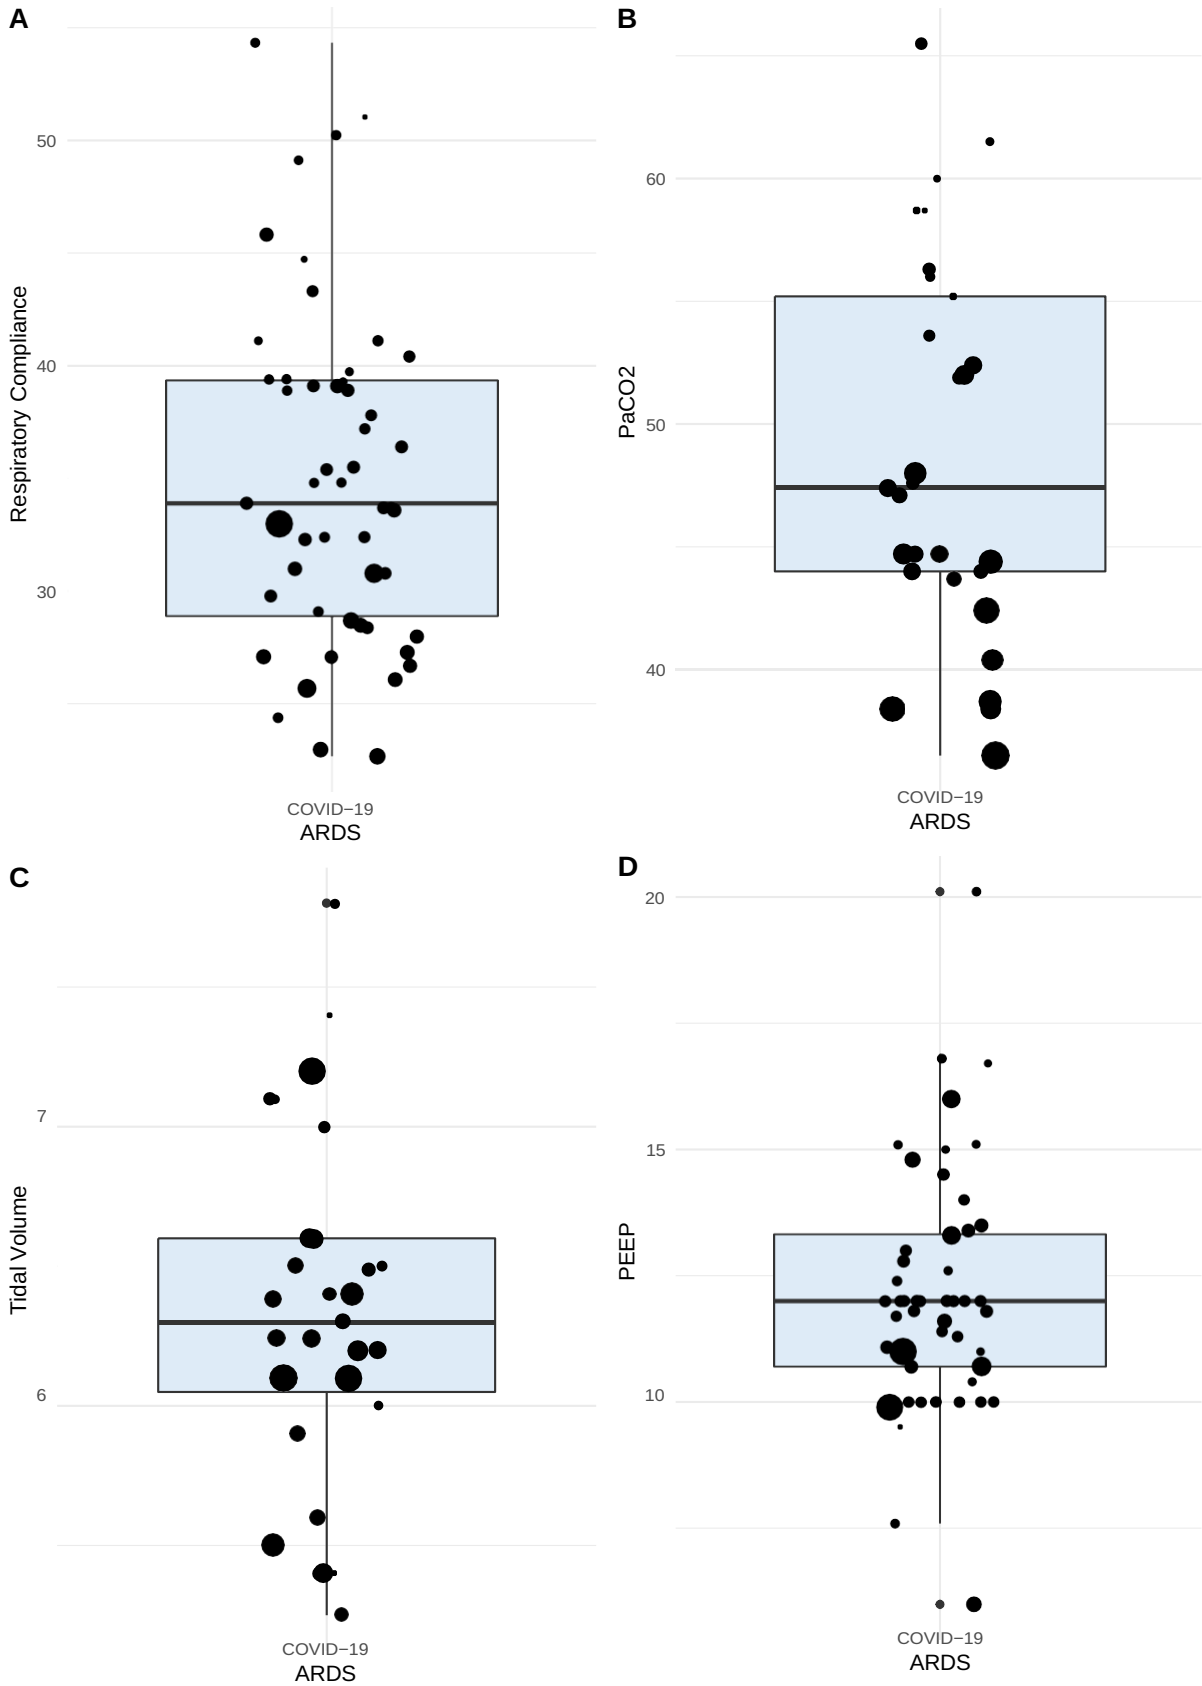

**Figure S3:** Forest plot demonstrating pooled compliance in all patients with coronavirus disease 2019 acute respiratory distress syndrome.

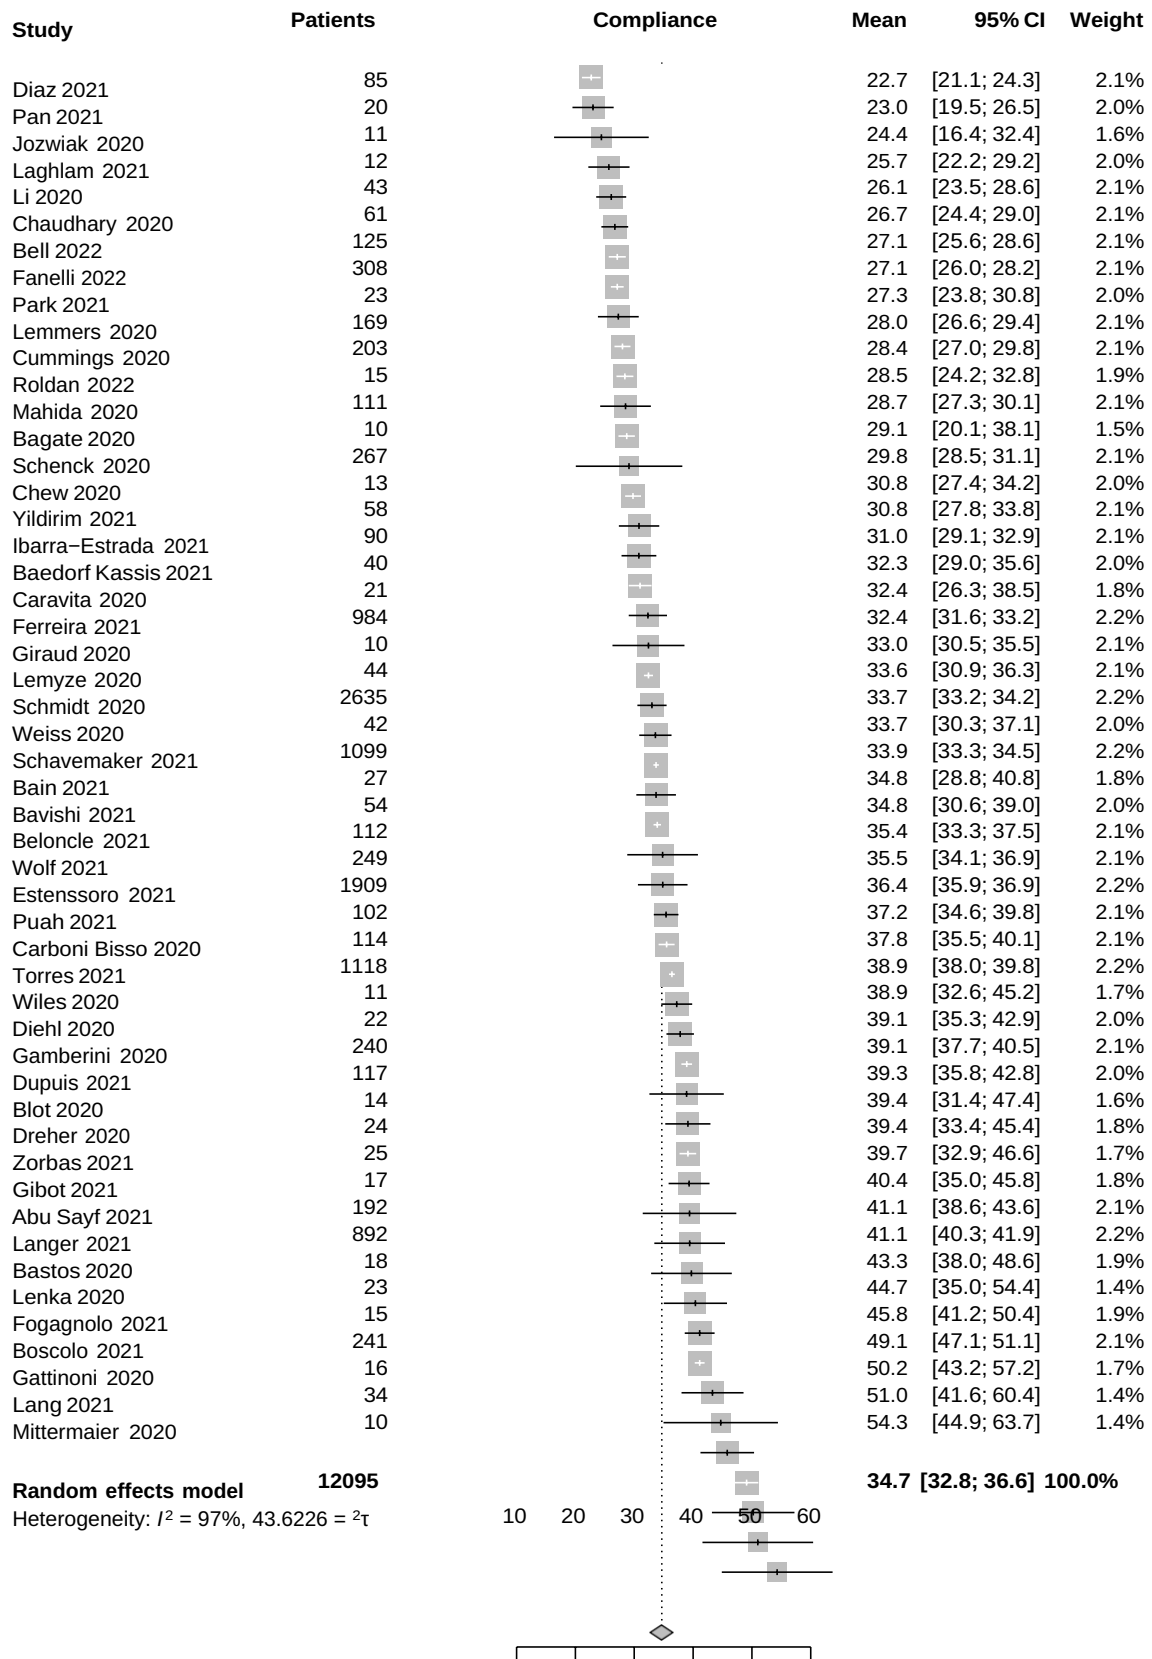

**Figure S4:** Funnel plot for the primary analysis pooling the compliance among all studies.

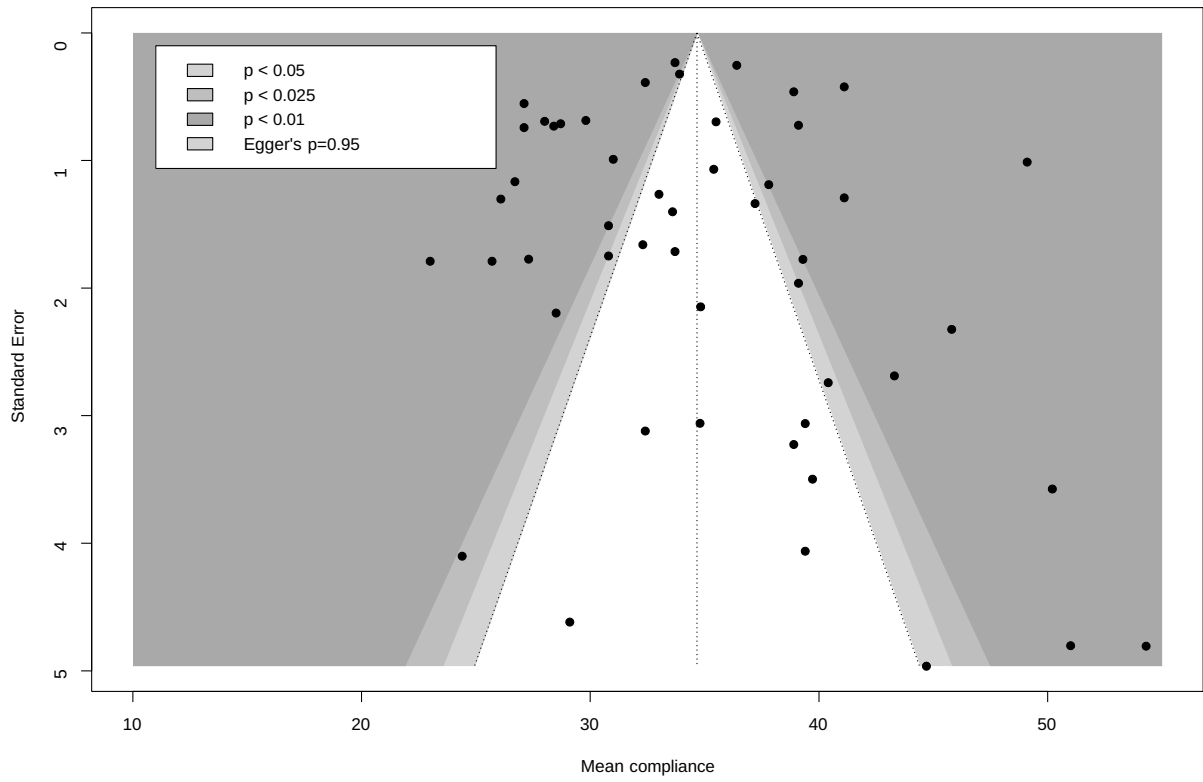

**Figure S5:** Forest plot comparing compliance with PaCO<sub>2</sub>

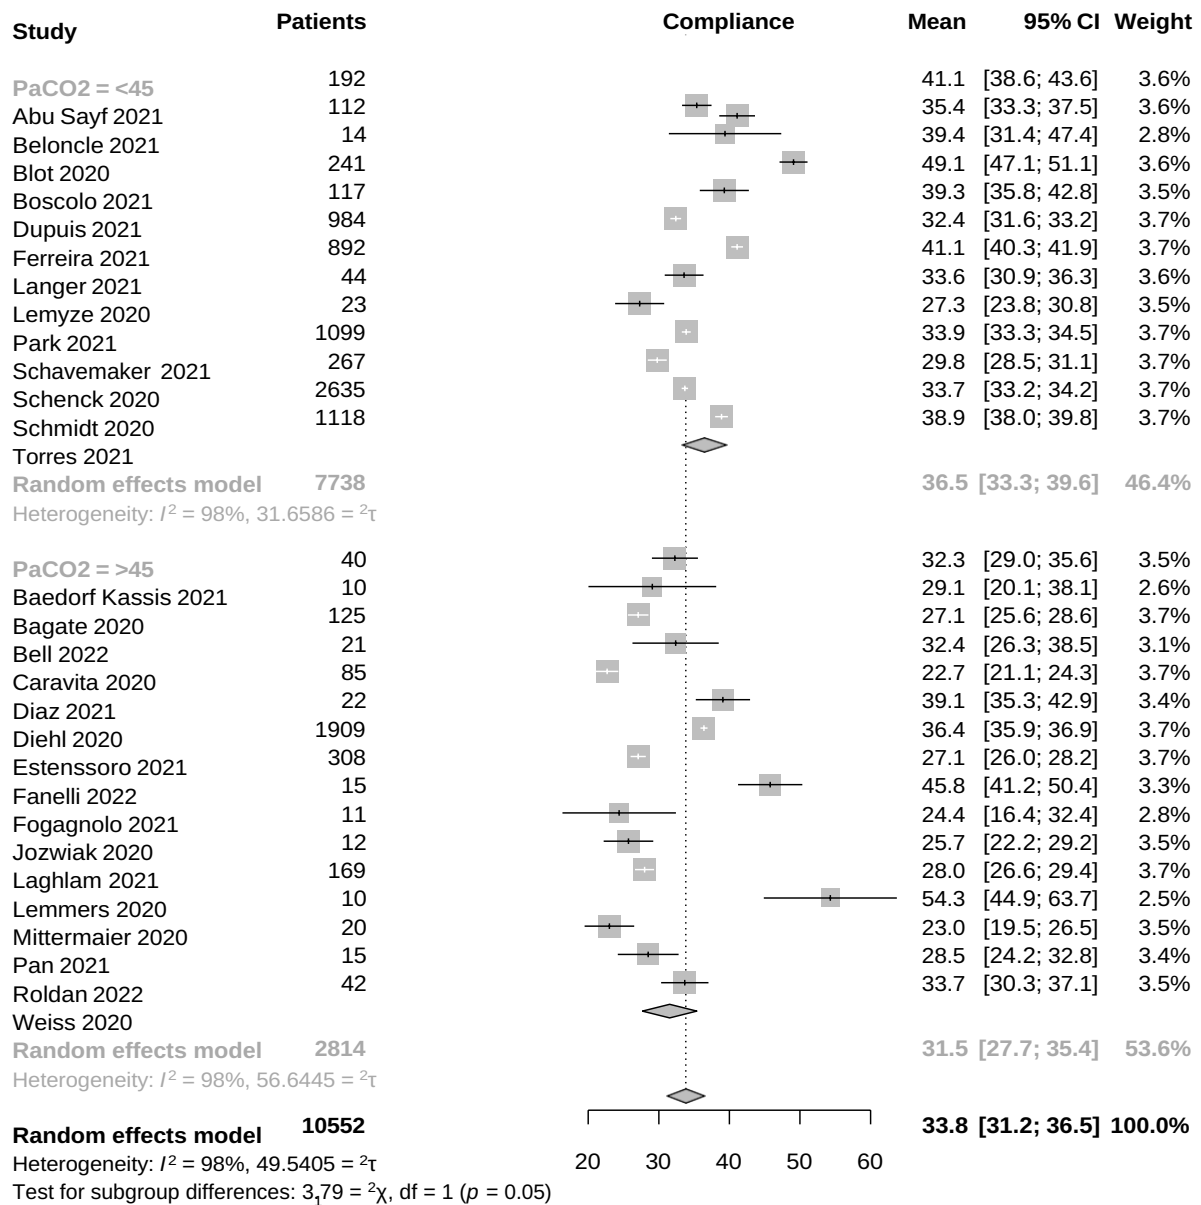



**Figure S6:** Forest plot comparing compliance with PEEP

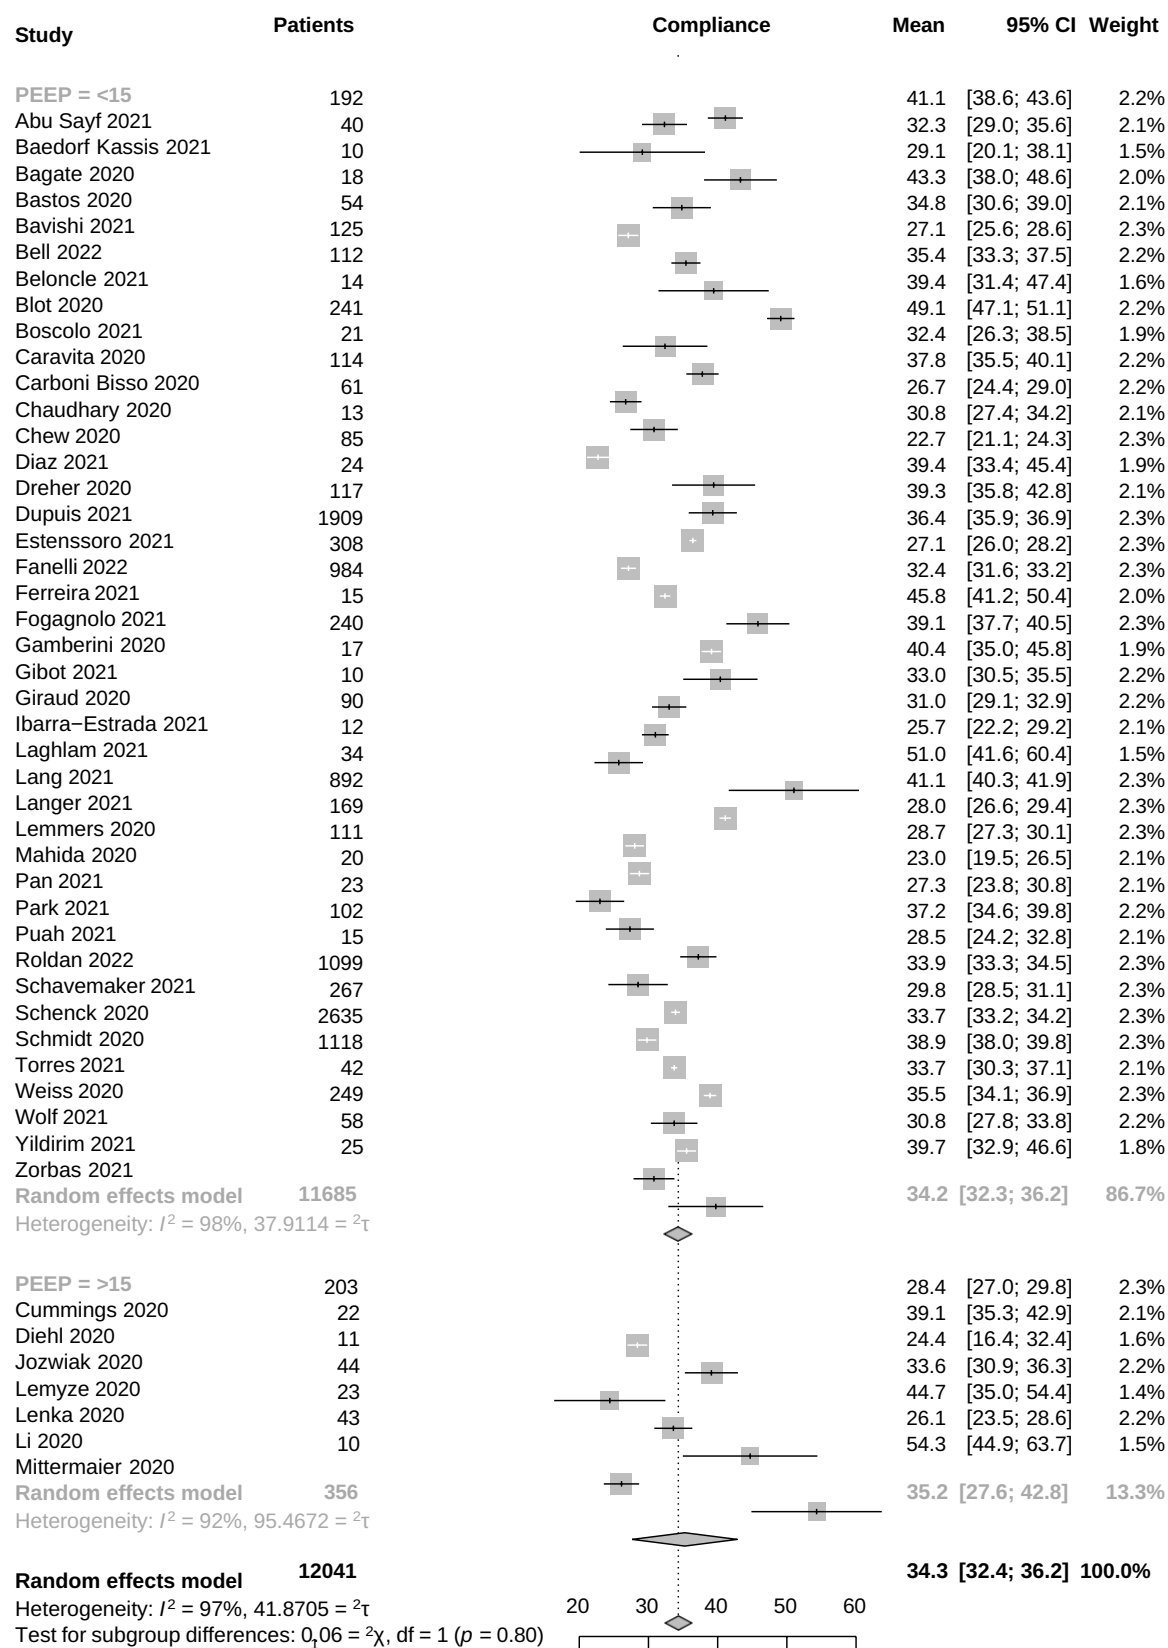

**Figure S7:** Univariable Meta-regression Analysis for COVID-19-ARDS studies by (A) PaO<sub>2</sub>/FiO<sub>2</sub> (B) tidal volume (C) PEEP (D) Driving pressure (E) PaCO<sub>2</sub> (F) Body Mass Index

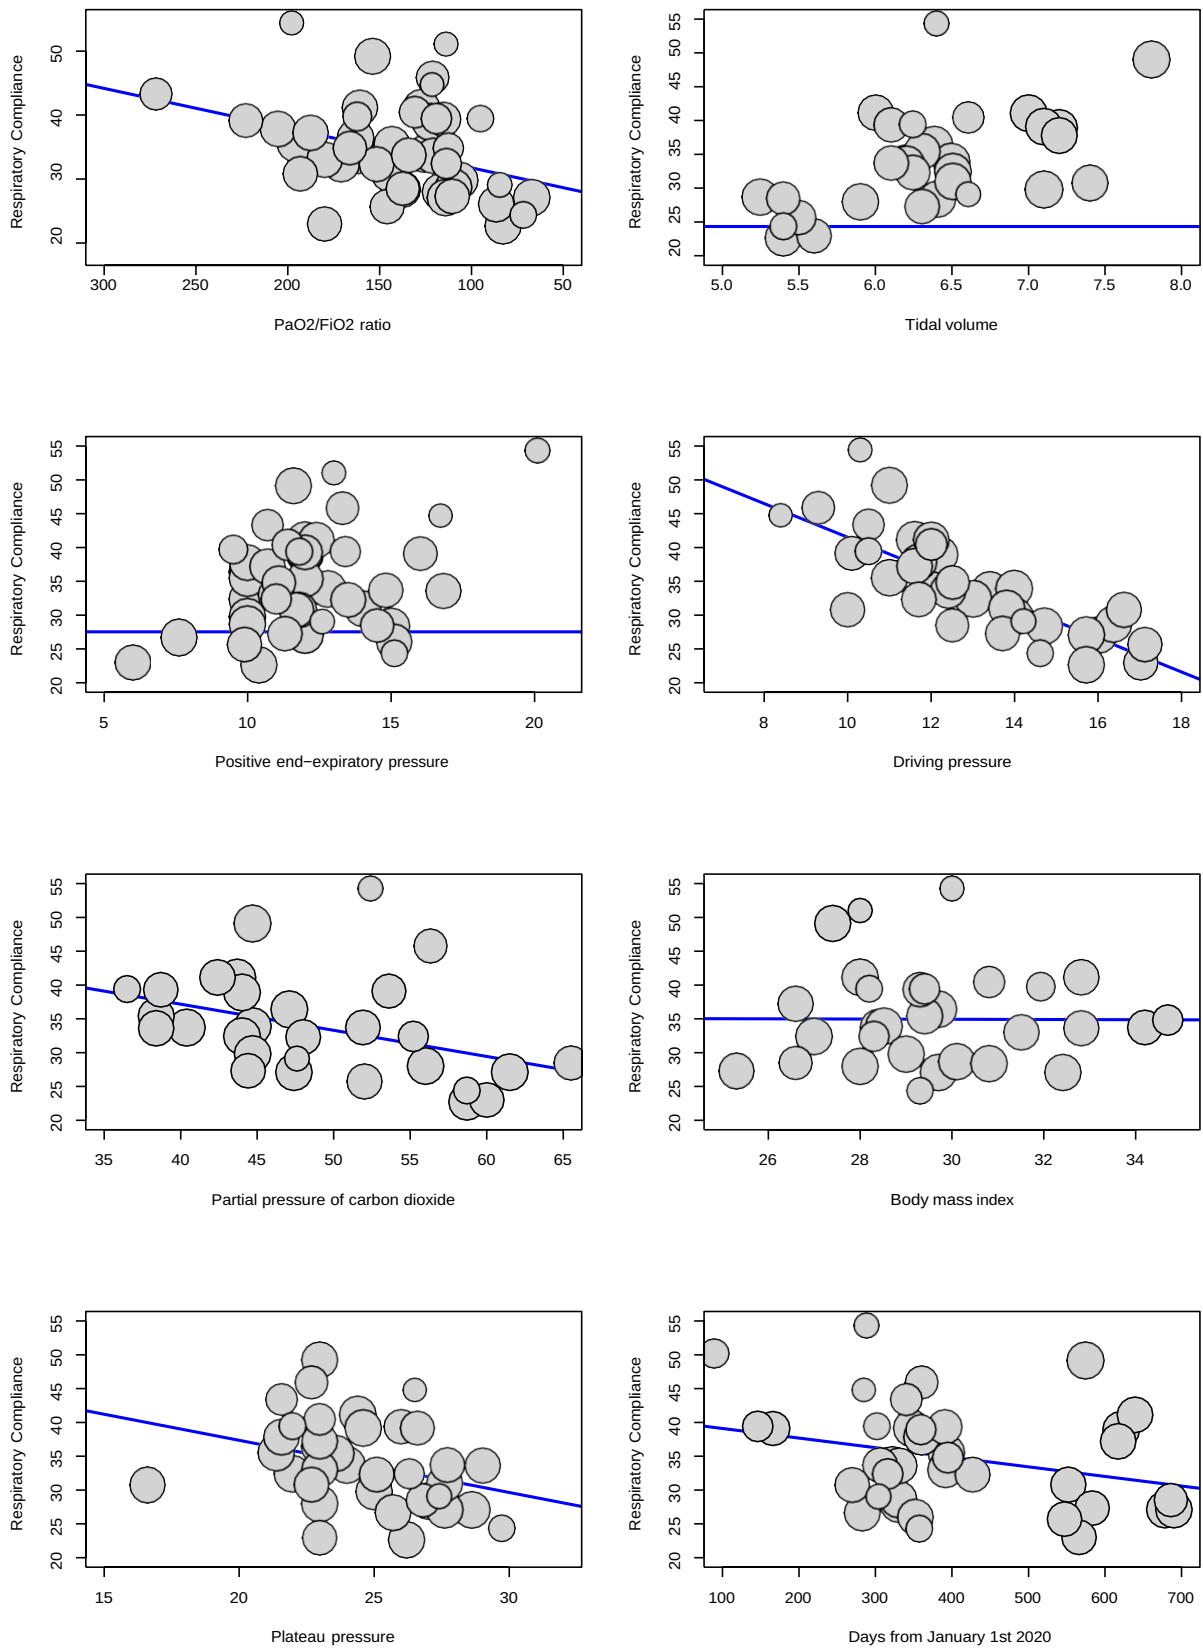

**Figure S8:** Post hoc analysis: Sensitivity analysis using fixed effect model

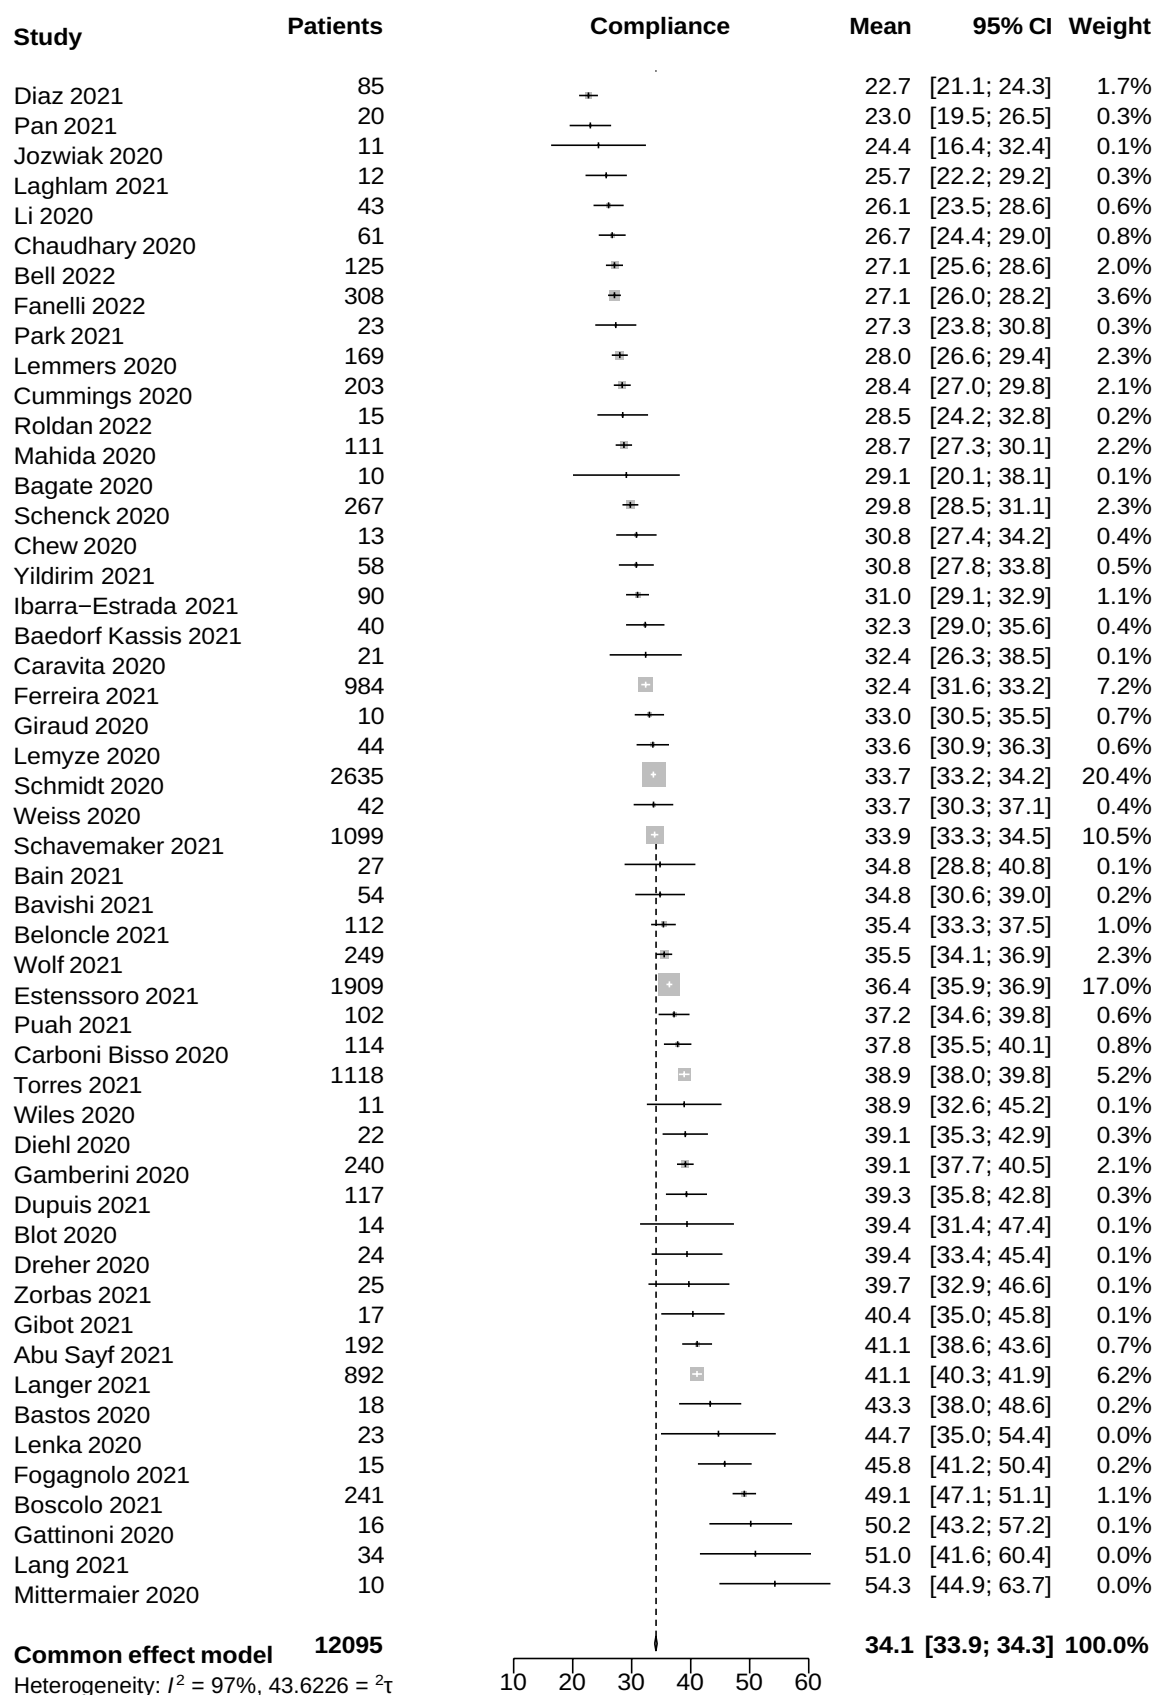

**Table S1: Search terms for C-ARDS SRMA**

|                                                                                                    | <b>Concept 1</b>                                                                                                                                                                                                                                                                                                                                                                                                                                                                                                                                                                                                                                                                                                                                                                                                                                                                                                                                                                                                                                            | <b>Concept 2</b>                                   | <b>Concept 3</b>                                                                              |
|----------------------------------------------------------------------------------------------------|-------------------------------------------------------------------------------------------------------------------------------------------------------------------------------------------------------------------------------------------------------------------------------------------------------------------------------------------------------------------------------------------------------------------------------------------------------------------------------------------------------------------------------------------------------------------------------------------------------------------------------------------------------------------------------------------------------------------------------------------------------------------------------------------------------------------------------------------------------------------------------------------------------------------------------------------------------------------------------------------------------------------------------------------------------------|----------------------------------------------------|-----------------------------------------------------------------------------------------------|
| <b>Key concepts</b>                                                                                | <b>COVID Patients</b>                                                                                                                                                                                                                                                                                                                                                                                                                                                                                                                                                                                                                                                                                                                                                                                                                                                                                                                                                                                                                                       | <b>ARDS patients</b>                               | <b>Intervention</b>                                                                           |
| <p><b>Controlled vocabulary terms / Subject terms</b></p> <p><b>(MeSH terms, Entree terms)</b></p> | <p>"coronavirus"[MH] OR<br/> "coronavirus infections"[MH] OR<br/> "coronavirus"[TW] OR<br/> "corona virus"[TW] OR<br/> "HCoV"[TW] OR<br/> "nCov"[TW] OR<br/> "covid"[TW] OR<br/> "covid19"[TW] OR "Severe Acute Respiratory Syndrome Coronavirus 2"[TW] OR "SARS-CoV2"[TW] OR "SARS-CoV 2"[TW] OR "SARS Coronavirus 2"[TW] OR "MERS-CoV"[TW])</p> <p>EMBASE:</p> <p>(SARS coronavirus/ or middle east respiratory syndrome/ or severe acute respiratory syndrome/ or (coronavirus* or corona virus* or HCoV* or ncov* or covid or covid19 or sars-cov* or sarscov* or Sars-coronavirus* or Severe Acute Respiratory Syndrome Coronavirus*).mp.) and 20191201:20220314. (dc)</p> <p>MEDLINE:</p> <p>("severe acute respiratory syndrome coronavirus 2"[Supplementary Concept] OR "COVID-19" [Supplementary Concept] OR "coronavirus" OR "corona virus" OR "HCoV" OR "nCov" OR "2019 CoV" OR "covid" OR "covid19" OR "Severe Acute Respiratory Syndrome Coronavirus 2" OR "SARS-CoV2" OR "SARS-CoV 2" OR "SARS Coronavirus 2") AND (2019/11/01:2022/03/14</p> | <p>ARDS OR acute respiratory distress syndrome</p> | <p>Intubate OR<br/> Intubated OR<br/> Mechanical ventilation OR<br/> Invasive ventilation</p> |

**Table S2: Data collection template**

|                                  |                           |                                          |
|----------------------------------|---------------------------|------------------------------------------|
| <b>Study characteristics:</b>    | Author                    |                                          |
|                                  | Date of publication       |                                          |
|                                  | Study start and end dates |                                          |
|                                  | Country                   |                                          |
| <b>Baseline demographics:</b>    | Age                       |                                          |
|                                  | Sex                       |                                          |
|                                  | Comorbidities             | COPD                                     |
|                                  |                           | HTN                                      |
|                                  |                           | CCF/IHD                                  |
|                                  |                           | BMI                                      |
| DM                               |                           |                                          |
| CKD                              |                           |                                          |
| <b>Clinical characteristics:</b> | Ventilator parameters     | FiO <sub>2</sub>                         |
|                                  |                           | PEEP                                     |
|                                  |                           | Respiratory rate                         |
|                                  |                           | Tidal volume                             |
|                                  |                           | Peak pressure                            |
|                                  |                           | plateau pressure                         |
|                                  |                           | Driving pressure                         |
|                                  | Lung compliance           | Static compliance                        |
|                                  | Gas exchange parameters   | PaO <sub>2</sub> /FiO <sub>2</sub> ratio |
|                                  |                           | SpO <sub>2</sub>                         |
| PaCO <sub>2</sub>                |                           |                                          |
| <b>Interventions</b>             | Pharmacological           | Paralysis                                |
|                                  |                           | Inhaled pulmonary vasodilators           |
|                                  |                           | Steroids                                 |
|                                  |                           | Novel antiviral therapies                |
|                                  | Non-Pharmacological       | ECMO                                     |
|                                  |                           | Prone position                           |
|                                  |                           | CRRT                                     |
|                                  |                           | Tracheostomy                             |
| <b>Outcomes:</b>                 | mortality                 | ICU mortality                            |
|                                  |                           | Hospital mortality                       |
|                                  |                           | 28-day mortality                         |
|                                  |                           | 60-day mortality                         |
|                                  |                           | 90-day mortality                         |
|                                  | Complications             | Pneumothorax                             |
|                                  |                           | VAP                                      |
|                                  |                           | VTE                                      |
|                                  |                           | Cardiac arrest                           |
|                                  | Time periods              | Duration of ventilation                  |
|                                  |                           | ICU length of stay                       |
| Hospital length of stay          |                           |                                          |

|                                                                                                                                                                                    |                                                                                                                                                                                                                                    |
|------------------------------------------------------------------------------------------------------------------------------------------------------------------------------------|------------------------------------------------------------------------------------------------------------------------------------------------------------------------------------------------------------------------------------|
| COPD: Chronic Obstructive Pulmonary Disease<br>HT: Hypertension<br>CCF: Congestive Cardiac Failure<br>BMI: Body Mass Index<br>DM: Diabetes Mellitus<br>CKD: Chronic kidney disease | AKI: Acute Kidney Injury<br>VAP: Ventilator-Acquired Pneumonia<br>VTE: Venous Thromboembolism<br>PEEP: Positive End Expiratory Pressure<br>CRRT: Continuous renal replacement therapy<br>ECMO: Extracorporeal membrane oxygenation |
|------------------------------------------------------------------------------------------------------------------------------------------------------------------------------------|------------------------------------------------------------------------------------------------------------------------------------------------------------------------------------------------------------------------------------|

**Table S3: Modified Newcastle Ottawa scores (mNOS) for all the COVID-19-ARDS studies**

| First Author                 | Sample representativeness | Sample size | Non-respondents | Ascertainment of compliance | Quality of descriptive statistics reporting | Total Modified NOS |
|------------------------------|---------------------------|-------------|-----------------|-----------------------------|---------------------------------------------|--------------------|
| Abu Sayf <sup>1</sup>        | 1                         | 1           | 1               | 1                           | 1                                           | 5                  |
| Baedorf Kassis <sup>2</sup>  | 0                         | 0           | 0               | 1                           | 1                                           | 2                  |
| Bagate <sup>3</sup>          | 0                         | 0           | 1               | 1                           | 1                                           | 3                  |
| Bain <sup>4</sup>            | 1                         | 0           | 0               | 1                           | 1                                           | 3                  |
| Bell <sup>5</sup>            | 1                         | 0           | 1               | 1                           | 1                                           | 4                  |
| Boscolo <sup>6</sup>         | 1                         | 1           | 0               | 1                           | 1                                           | 4                  |
| Bastos <sup>7</sup>          | 0                         | 0           | 0               | 1                           | 1                                           | 2                  |
| Bavishi <sup>8</sup>         | 0                         | 0           | 1               | 1                           | 1                                           | 3                  |
| Beloncle <sup>9</sup>        | 1                         | 0           | 1               | 1                           | 1                                           | 4                  |
| Blot <sup>10</sup>           | 0                         | 0           | 1               | 1                           | 1                                           | 3                  |
| Caravita <sup>11</sup>       | 1                         | 0           | 1               | 1                           | 1                                           | 4                  |
| Carboni Bisso <sup>12</sup>  | 0                         | 0           | 1               | 1                           | 1                                           | 3                  |
| Chaudhary <sup>13</sup>      | 0                         | 0           | 0               | 1                           | 1                                           | 2                  |
| Chew <sup>14</sup>           | 0                         | 0           | 1               | 1                           | 1                                           | 3                  |
| Cummings <sup>15</sup>       | 1                         | 1           | 1               | 1                           | 1                                           | 5                  |
| Diaz <sup>16</sup>           | 0                         | 0           | 1               | 1                           | 1                                           | 3                  |
| Diehl <sup>17</sup>          | 0                         | 0           | 1               | 1                           | 1                                           | 3                  |
| Dreher <sup>18</sup>         | 0                         | 0           | 1               | 1                           | 1                                           | 3                  |
| Dupuis <sup>19</sup>         | 0                         | 1           | 1               | 1                           | 1                                           | 4                  |
| Estenssoro <sup>20</sup>     | 1                         | 1           | 1               | 1                           | 1                                           | 5                  |
| Fanelli <sup>21</sup>        | 1                         | 1           | 1               | 1                           | 1                                           | 5                  |
| Ferreira <sup>22</sup>       | 0                         | 1           | 1               | 1                           | 1                                           | 4                  |
| Fognolo <sup>23</sup>        | 0                         | 0           | 1               | 1                           | 1                                           | 3                  |
| Gamberini <sup>24</sup>      | 1                         | 1           | 1               | 1                           | 1                                           | 5                  |
| Gattinoni <sup>25</sup>      | 0                         | 0           | 0               | 1                           | 1                                           | 2                  |
| Gibot <sup>26</sup>          | 0                         | 0           | 0               | 1                           | 1                                           | 2                  |
| Giraud <sup>27</sup>         | 0                         | 0           | 1               | 1                           | 1                                           | 3                  |
| Ibarra-Estrada <sup>28</sup> | 0                         | 0           | 1               | 1                           | 1                                           | 3                  |
| Jozwiak <sup>29</sup>        | 0                         | 0           | 0               | 1                           | 1                                           | 2                  |
| Laghlam <sup>30</sup>        | 0                         | 0           | 1               | 1                           | 1                                           | 3                  |
| Lang <sup>31</sup>           | 0                         | 0           | 0               | 1                           | 1                                           | 2                  |
| Langer <sup>32</sup>         | 1                         | 1           | 1               | 1                           | 1                                           | 5                  |
| Lemmers <sup>33</sup>        | 0                         | 0           | 1               | 1                           | 1                                           | 3                  |
| Lemyze <sup>34</sup>         | 0                         | 0           | 1               | 1                           | 1                                           | 3                  |
| Lenka <sup>35</sup>          | 0                         | 0           | 0               | 1                           | 1                                           | 2                  |
| Li <sup>36</sup>             | 0                         | 0           | 1               | 1                           | 1                                           | 3                  |
| Mahida <sup>37</sup>         | 0                         | 0           | 1               | 1                           | 1                                           | 3                  |
| Mittermaier <sup>38</sup>    | 0                         | 0           | 1               | 1                           | 1                                           | 3                  |
| Pan <sup>39</sup>            | 1                         | 0           | 1               | 1                           | 1                                           | 4                  |
| Park <sup>40</sup>           | 0                         | 0           | 1               | 1                           | 1                                           | 3                  |
| Puah <sup>41</sup>           | 1                         | 0           | 1               | 1                           | 1                                           | 4                  |
| Roldan <sup>42</sup>         | 0                         | 0           | 1               | 1                           | 1                                           | 3                  |
| Schavemaker <sup>43</sup>    | 1                         | 1           | 1               | 1                           | 1                                           | 5                  |
| Schenck <sup>44</sup>        | 0                         | 1           | 1               | 1                           | 1                                           | 4                  |
| Schmidt <sup>45</sup>        | 1                         | 1           | 0               | 1                           | 1                                           | 4                  |
| Torres <sup>46</sup>         | 1                         | 1           | 1               | 1                           | 1                                           | 5                  |
| Weiss <sup>47</sup>          | 1                         | 0           | 0               | 1                           | 1                                           | 3                  |
| Wiles <sup>48</sup>          | 0                         | 0           | 1               | 1                           | 0                                           | 2                  |
| Wolf <sup>49</sup>           | 0                         | 1           | 0               | 1                           | 1                                           | 3                  |
| Yildirim <sup>50</sup>       | 0                         | 0           | 1               | 1                           | 1                                           | 3                  |
| Zorbas <sup>51</sup>         | 1                         | 0           | 1               | 1                           | 1                                           | 4                  |

**Table S4: GRADE**

| Number of studies                                             | Certainty assessment  |                          |                            |              |             |                      | Effect           |                       |                                        | Certainty        | Importance |
|---------------------------------------------------------------|-----------------------|--------------------------|----------------------------|--------------|-------------|----------------------|------------------|-----------------------|----------------------------------------|------------------|------------|
|                                                               | Study design          | Risk of bias             | Inconsistency              | Indirectness | Imprecision | Other considerations | Number of events | Number of individuals | Rate (95% CI)                          |                  |            |
| Compliance in only unselected patients (assessed with cm H2O) |                       |                          |                            |              |             |                      |                  |                       |                                        |                  |            |
| 37                                                            | observational studies | not serious <sup>a</sup> | not serious <sup>b</sup>   | not serious  | not serious | none                 | -                | 11,356                | mean 35.8 (33.9 to 37.8)               | ⊕⊕⊕⊕<br>HIGH     | CRITICAL   |
| Compliance in all studies (assessed with cm H2O)              |                       |                          |                            |              |             |                      |                  |                       |                                        |                  |            |
| 51                                                            | observational studies | not serious <sup>a</sup> | not serious <sup>b</sup>   | not serious  | not serious | none                 | -                | 12,095                | mean 34.7 (32.8 to 36.6)               | ⊕⊕⊕⊕<br>HIGH     | CRITICAL   |
| 28-day mortality (assessed with %)                            |                       |                          |                            |              |             |                      |                  |                       |                                        |                  |            |
| 13                                                            | observational studies | not serious              | serious <sup>c,d</sup>     | not serious  | not serious | none                 | 3,343            | 8,540                 | event rate 43.2 per 100 (32.6 to 54.1) | ⊕⊕⊕⊖<br>MODERATE | CRITICAL   |
| Intensive care unit mortality (assessed with %)               |                       |                          |                            |              |             |                      |                  |                       |                                        |                  |            |
| 27                                                            | observational studies | not serious              | serious <sup>c,d</sup>     | not serious  | not serious | none                 | 3,601            | 9,362                 | event rate 35.7 per 100 (29.4 to 42.2) | ⊕⊕⊕⊖<br>MODERATE | CRITICAL   |
| In-hospital mortality (assessed with: %)                      |                       |                          |                            |              |             |                      |                  |                       |                                        |                  |            |
| 14                                                            | observational studies | not serious              | serious <sup>c,d</sup>     | not serious  | not serious | none                 | 2,916            | 7,160                 | event rate 39.1 per 100 (32.6 to 45.8) | ⊕⊕⊕⊖<br>MODERATE | CRITICAL   |
| Intensive care unit length of stay (assessed with: days)      |                       |                          |                            |              |             |                      |                  |                       |                                        |                  |            |
| 25                                                            | observational studies | not serious              | not serious <sup>c,e</sup> | not serious  | not serious | none                 | -                | 10,832                | mean 19 days (15 to 22)                | ⊕⊕⊕⊕<br>HIGH     | IMPORTANT  |
| Hospital length of stay (assessed with: days)                 |                       |                          |                            |              |             |                      |                  |                       |                                        |                  |            |

| Number of studies                                                                                                                                                                                                                                                                                                                                                                                                                                                                                                                                                                                                                                                                                                                                                                                                                                                                                                                                                                                                                                                                                                                                                                                                                                                                             | Certainty assessment  |              |                            |              |                      |                      | Effect           |                       |                          | Certainty       | Importance |
|-----------------------------------------------------------------------------------------------------------------------------------------------------------------------------------------------------------------------------------------------------------------------------------------------------------------------------------------------------------------------------------------------------------------------------------------------------------------------------------------------------------------------------------------------------------------------------------------------------------------------------------------------------------------------------------------------------------------------------------------------------------------------------------------------------------------------------------------------------------------------------------------------------------------------------------------------------------------------------------------------------------------------------------------------------------------------------------------------------------------------------------------------------------------------------------------------------------------------------------------------------------------------------------------------|-----------------------|--------------|----------------------------|--------------|----------------------|----------------------|------------------|-----------------------|--------------------------|-----------------|------------|
|                                                                                                                                                                                                                                                                                                                                                                                                                                                                                                                                                                                                                                                                                                                                                                                                                                                                                                                                                                                                                                                                                                                                                                                                                                                                                               | Study design          | Risk of bias | Inconsistency              | Indirectness | Imprecision          | Other considerations | Number of events | Number of individuals | Rate (95% CI)            |                 |            |
| 17                                                                                                                                                                                                                                                                                                                                                                                                                                                                                                                                                                                                                                                                                                                                                                                                                                                                                                                                                                                                                                                                                                                                                                                                                                                                                            | observational studies | not serious  | not serious <sup>c,e</sup> | not serious  | not serious          | none                 | -                | 8,902                 | mean 28 days (23 to 34)  | ⊕⊕⊕⊕<br>HIGH    | IMPORTANT  |
| Ventilator free days (assessed with: days)                                                                                                                                                                                                                                                                                                                                                                                                                                                                                                                                                                                                                                                                                                                                                                                                                                                                                                                                                                                                                                                                                                                                                                                                                                                    |                       |              |                            |              |                      |                      |                  |                       |                          |                 |            |
| 7                                                                                                                                                                                                                                                                                                                                                                                                                                                                                                                                                                                                                                                                                                                                                                                                                                                                                                                                                                                                                                                                                                                                                                                                                                                                                             | observational studies | not serious  | not serious <sup>c,e</sup> | not serious  | serious <sup>f</sup> | none                 | -                | 1,562                 | mean 5 days (2.9 to 7.6) | ⊕⊕⊕<br>MODERATE | IMPORTANT  |
| <p>Explanations</p> <p>a: Some studies were rated as having a higher risk of bias (mNOS&lt;3). Trim-and-fill analysis found that the pooled estimate remained similar after excluding these studies (34.4), suggesting that the effect of bias on the pooled estimate was likely minimal</p> <p>b: There was a high I2 value (96.8%), and a wide range of the point estimates. However, several important sources of heterogeneity were found, and include the PaO2/FiO2 ratio, PEEP, Tidal volume, Driving pressure, and the presence of obesity (BMI&gt;30). These were likely to have contributed to the heterogeneity, and hence we did not downgrade for inconsistency</p> <p>c: There was a high I2 value (&gt;90%)</p> <p>d: Visual inspection of the forest plot showed significant variability between the point estimates and only occasional overlapping of the confidence intervals</p> <p>e: However, visual inspection of the forest plot showed some variability and significant overlapping of the confidence intervals</p> <p>f: The recommended optimal information size (&gt;2000) was reached. However, the confidence intervals are wide compared to the pooled estimate (100% of the pooled estimate). This was a borderline decision to rate down for imprecision.</p> |                       |              |                            |              |                      |                      |                  |                       |                          |                 |            |



**Table S5: References for the studies included in this systematic review**

|     |                                                                                                                                                                                                                                                                                 |
|-----|---------------------------------------------------------------------------------------------------------------------------------------------------------------------------------------------------------------------------------------------------------------------------------|
| 1.  | Abu Sayf A, Ouellette D, Fadel R. Mechanical ventilation and COVID-19: A case-control analysis of clinical characteristics, lung mechanics, and mortality. <i>Chest</i> 2021; 160(4): A1012-A.                                                                                  |
| 2.  | Baedorf Kassis E, Schaefer MS, Maley JH, et al. Transpulmonary pressure measurements and lung mechanics in patients with early ARDS and SARS-CoV-2. <i>J Crit Care</i> 2021; 63: 106-12.                                                                                        |
| 3.  | Bagate F, Tuffet S, Masi P, et al. Rescue therapy with inhaled nitric oxide and almitrine in COVID-19 patients with severe acute respiratory distress syndrome. <i>Ann Intensive Care</i> 2020; 10(1): 151.                                                                     |
| 4.  | Bain W, Yang H, Shah FA, et al. COVID-19 versus Non-COVID-19 Acute Respiratory Distress Syndrome: Comparison of Demographics, Physiologic Parameters, Inflammatory Biomarkers, and Clinical Outcomes. <i>Ann Am Thorac Soc</i> 2021; 18(7): 1202-10.                            |
| 5.  | Bell J, William Pike C, Kreisel C, Sonti R, Cobb N. Predicting Impact of Prone Position on Oxygenation in Mechanically Ventilated Patients with COVID-19. <i>Journal of Intensive Care Medicine</i> 2022: 08850666221081757.                                                    |
| 6.  | Boscolo A, Sella N, Lorenzoni G, et al. Static compliance and driving pressure are associated with ICU mortality in intubated COVID-19 ARDS. <i>Critical Care</i> 2021; 25(1): 263.                                                                                             |
| 7.  | Bastos GAN, Azambuja AZ, Polanczyk CA, et al. Clinical characteristics and predictors of mechanical ventilation in patients with COVID-19 hospitalized in Southern Brazil. <i>Rev Bras Ter Intensiva</i> 2020; 32(4): 487-92.                                                   |
| 8.  | Bavishi AA, Mylvaganam RJ, Agarwal R, Avery RJ, Cuttica MJ. Timing of Intubation in Coronavirus Disease 2019: A Study of Ventilator Mechanics, Imaging, Findings, and Outcomes. <i>Crit Care Explor</i> 2021; 3(5): e0415.                                                      |
| 9.  | Beloncle F, Studer A, Seegers V, et al. Longitudinal changes in compliance, oxygenation and ventilatory ratio in COVID-19 versus non-COVID-19 pulmonary acute respiratory distress syndrome. <i>Crit Care</i> 2021; 25(1): 248.                                                 |
| 10. | Blot M, Jacquier M, Aho Glele LS, et al. CXCL10 could drive longer duration of mechanical ventilation during COVID-19 ARDS. <i>Crit Care</i> 2020; 24(1): 632.                                                                                                                  |
| 11. | Caravita S, Baratto C, Di Marco F, et al. Haemodynamic characteristics of COVID-19 patients with acute respiratory distress syndrome requiring mechanical ventilation: An invasive assessment using right heart catheterization. <i>Eur J Heart Fail</i> 2020; 22(12): 2228-37. |
| 12. | Carboni Bisso I, Huespe I, Lockhart C, et al. Clinical characteristics of critically ill patients with COVID-19. <i>Medicina (B Aires)</i> 2021; 81(4): 527-35.                                                                                                                 |
| 13. | Chaudhary S, Lo KB, Matta A, Azmaiparashvili Z, Benzaquen S, Patarroyo-Aponte G. Ventilator mechanics and outcomes in critically ill patients with COVID-19 infection. <i>CHEST</i> 2020; 158(4): A627.                                                                         |
| 14. | Chew SY, Lee YS, Ghimiray D, Tan CK, Chua GS. Characteristics and Outcomes of COVID-19 Patients with Respiratory Failure Admitted to a "Pandemic Ready" Intensive Care Unit - Lessons from Singapore. <i>Ann Acad Med Singap</i> 2020; 49(7): 434-48.                           |
| 15. | Cummings MJ, Baldwin MR, Abrams D, et al. Epidemiology, clinical course, and outcomes of critically ill adults with COVID-19 in New York City: a prospective cohort study. <i>Lancet</i> 2020; 395(10239): 1763-70.                                                             |
| 16. | Diaz RA, Graf J, Zambrano JM, et al. Extracorporeal Membrane Oxygenation for COVID-19-associated Severe Acute Respiratory Distress Syndrome in Chile: A Nationwide Incidence and Cohort Study. <i>Am J Respir Crit Care Med</i> 2021; 204(1): 34-43.                            |
| 17. | Diehl JL, Peron N, Chocron R, et al. Respiratory mechanics and gas exchanges in the early course of COVID-19 ARDS: a hypothesis-generating study. <i>Ann Intensive Care</i> 2020; 10(1): 95.                                                                                    |
| 18. | Dreher M, Kersten A, Bickenbach J, et al. The Characteristics of 50 Hospitalized COVID-19 Patients With and Without ARDS. <i>Dtsch Arztebl Int</i> 2020; 117(16): 271-8.                                                                                                        |
| 19. | Dupuis C, Bouadma L, de Montmollin E, et al. Association Between Early Invasive Mechanical Ventilation and Day-60 Mortality in Acute Hypoxemic Respiratory Failure Related to Coronavirus Disease-2019 Pneumonia. <i>Crit Care Explor</i> 2021; 3(1): e0329.                    |
| 20. | Estenssoro E, Loudet CI, Ríos FG, et al. Clinical characteristics and outcomes of invasively ventilated patients with COVID-19 in Argentina (SATICOVID): a prospective, multicentre cohort study. <i>Lancet Respir Med</i> 2021; 9(9): 989-98.                                  |
| 21. | Fanelli V, Giani M, Grasselli G, et al. Extracorporeal membrane oxygenation for COVID-19 and influenza H1N1 associated acute respiratory distress syndrome: a multicenter retrospective cohort study. <i>Critical Care</i> 2022; 26(1): 34.                                     |
| 22. | Ferreira JC, Ho YL, Besen B, et al. Protective ventilation and outcomes of critically ill patients with COVID-19: a cohort study. <i>Ann Intensive Care</i> 2021; 11(1): 92.                                                                                                    |
| 23. | Fogagnolo A, Grasso S, Dres M, et al. Focus on renal blood flow in mechanically ventilated patients with SARS-CoV-2: a prospective pilot study. <i>J Clin Monit Comput</i> 2021; 1-7.                                                                                           |
| 24. | Gamberini L, Tonetti T, Spadaro S, et al. Factors influencing liberation from mechanical ventilation in coronavirus disease 2019: multicenter observational study in fifteen Italian ICUs. <i>J Intensive Care</i> 2020; 8: 80.                                                 |
| 25. | Gattinoni L, Coppola S, Cressoni M, Busana M, Rossi S, Chiumello D. COVID-19 Does Not Lead to a "Typical" Acute Respiratory Distress Syndrome. <i>Am J Respir Crit Care Med</i> 2020; 201(10): 1299-300.                                                                        |

|     |                                                                                                                                                                                                                                                                                                               |
|-----|---------------------------------------------------------------------------------------------------------------------------------------------------------------------------------------------------------------------------------------------------------------------------------------------------------------|
| 26. | Gibot S, Conrad M, Courte G, Cravoisy A. Positive End-Expiratory Pressure Setting in COVID-19-Related Acute Respiratory Distress Syndrome: Comparison Between Electrical Impedance Tomography, PEEP/FiO <sub>2</sub> Tables, and Transpulmonary Pressure. <i>Frontiers in Medicine</i> 2021; 8.               |
| 27. | Giraud R, Legouis D, Assouline B, et al. Timing of VV-ECMO therapy implementation influences prognosis of COVID-19 patients. <i>Physiol Rep</i> 2021; 9(3): e14715.                                                                                                                                           |
| 28. | Ibarra-Estrada M, García-Salas Y, Mireles-Cabodevila E, et al. Use of Airway Pressure Release Ventilation in Patients With Acute Respiratory Failure Due to Coronavirus Disease 2019: Results of a Single-Center Randomized Controlled Trial. <i>Crit Care Med</i> 2021.                                      |
| 29. | Jozwiak M, Chiche JD, Charpentier J, et al. Use of Venovenous Extracorporeal Membrane Oxygenation in Critically-Ill Patients With COVID-19. <i>Front Med (Lausanne)</i> 2020; 7: 614569.                                                                                                                      |
| 30. | Laghlam D, Rahoual G, Malvy J, Estagnasié P, Brusset A, Squara P. Use of Almitrine and Inhaled Nitric Oxide in ARDS Due to COVID-19. <i>Frontiers in Medicine</i> 2021; 8.                                                                                                                                    |
| 31. | Lang CN, Zotzmann V, Schmid B, et al. Intensive Care Resources and 60-Day Survival of Critically-Ill COVID-19 Patients. <i>Cureus</i> 2021; 13(2): e13210.                                                                                                                                                    |
| 32. | Langer T, Brioni M, Guzzardella A, et al. Prone position in intubated, mechanically ventilated patients with COVID-19: a multi-centric study of more than 1000 patients. <i>Critical Care</i> 2021; 25(1): 128.                                                                                               |
| 33. | Lemmers DHL, Abu Hilal M, Bnà C, et al. Pneumomediastinum and subcutaneous emphysema in COVID-19: barotrauma or lung frailty? <i>ERJ Open Res</i> 2020; 6(4).                                                                                                                                                 |
| 34. | Lemyze M, Courageux N, Maladobry T, et al. Implications of Obesity for the Management of Severe Coronavirus Disease 2019 Pneumonia. <i>Crit Care Med</i> 2020; 48(9): e761-e7.                                                                                                                                |
| 35. | Lenka J, Chhabria MS, Sharma N, et al. Clinical characteristics and outcomes of critically ill patients with COVID-19 in a tertiary community hospital in upstate New York. <i>J Community Hosp Intern Med Perspect</i> 2020; 10(6): 491-500.                                                                 |
| 36. | Li J, Fink JB, Augustynovich AE, Mirza S, Kallet RH, Dhand R. Effects of Inhaled Epoprostenol and Prone Positioning in Intubated Coronavirus Disease 2019 Patients With Refractory Hypoxemia. <i>Crit Care Explor</i> 2020; 2(12): e0307.                                                                     |
| 37. | Mahida RY, Chotalia M, Alderman J, et al. Characterisation and outcomes of ARDS secondary to pneumonia in patients with and without SARS-CoV-2: a single-centre experience. <i>BMJ Open Respir Res</i> 2020; 7(1).                                                                                            |
| 38. | Mittermaier M, Pickerodt P, Kurth F, et al. Evaluation of PEEP and prone positioning in early COVID-19 ARDS. <i>EclinicalMedicine</i> 2020; 28: 100579.                                                                                                                                                       |
| 39. | Pan C, Lu C, She X, et al. Evaluation of Positive End-Expiratory Pressure Strategies in Patients With Coronavirus Disease 2019-Induced Acute Respiratory Distress Syndrome. <i>Front Med (Lausanne)</i> 2021; 8: 637747.                                                                                      |
| 40. | Park J, Lee HY, Lee J, Lee SM. Effect of prone positioning on oxygenation and static respiratory system compliance in COVID-19 ARDS vs. non-COVID ARDS. <i>Respir Res</i> 2021; 22(1): 220.                                                                                                                   |
| 41. | Puah SH, Cove ME, Phua J, et al. Association between lung compliance phenotypes and mortality in COVID-19 patients with acute respiratory distress syndrome. <i>Ann Acad Med Singap</i> 2021; 50(9): 686-94.                                                                                                  |
| 42. | Roldán R, Rodríguez S, Barriga F, et al. Sequential lateral positioning as a new lung recruitment maneuver: an exploratory study in early mechanically ventilated Covid-19 ARDS patients. <i>Ann Intensive Care</i> 2022; 12(1): 13.                                                                          |
| 43. | Schavemaker R, Schultz MJ, Lagrand WK, van Slobbe-Bijlsma ER, Serpa Neto A, Paulus F. Associations of Body Mass Index with Ventilation Management and Clinical Outcomes in Invasively Ventilated Patients with ARDS Related to COVID-19-Insights from the PROVENT-COVID Study. <i>J Clin Med</i> 2021; 10(6). |
| 44. | Schenck EJ, Hoffman K, Goyal P, et al. Respiratory Mechanics and Gas Exchange in COVID-19-associated Respiratory Failure. <i>Ann Am Thorac Soc</i> 2020; 17(9): 1158-61.                                                                                                                                      |
| 45. | Clinical characteristics and day-90 outcomes of 4244 critically ill adults with COVID-19: a prospective cohort study. <i>Intensive Care Med</i> 2021; 47(1): 60-73.                                                                                                                                           |
| 46. | Torres A, Motos A, Riera J, et al. The evolution of the ventilatory ratio is a prognostic factor in mechanically ventilated COVID-19 ARDS patients. <i>Crit Care</i> 2021; 25(1): 331.                                                                                                                        |
| 47. | Weiss TT, Cerda F, Scott JB, et al. Prone positioning for patients intubated for severe acute respiratory distress syndrome (ARDS) secondary to COVID-19: a retrospective observational cohort study. <i>Br J Anaesth</i> 2021; 126(1): 48-55.                                                                |
| 48. | Wiles S, Mireles-Cabodevila E, Neuhofs S, Mukhopadhyay S, Reynolds JP, Hatipoğlu U. Endotracheal Tube Obstruction Among Patients Mechanically Ventilated for ARDS Due to COVID-19: A Case Series. <i>J Intensive Care Med</i> 2021; 36(5): 604-11.                                                            |
| 49. | Wolf M, Alladina J, Navarrete-Welton A, et al. Obesity and Critical Illness in COVID-19: Respiratory Pathophysiology. <i>Obesity (Silver Spring)</i> 2021; 29(5): 870-8.                                                                                                                                      |
| 50. | ESICM LIVES 2021: Part 1. <i>Intensive Care Medicine Experimental</i> 2021; 9(1): 51.                                                                                                                                                                                                                         |
| 51. | Zorbas JS, Ho KM, Litton E, Wibrow B, Fysh E, Anstey MH. Airway pressure release ventilation in mechanically ventilated patients with COVID-19: a multicenter observational study. <i>Acute Crit Care</i> 2021; 36(2): 143-50.                                                                                |

**Table S6a:** Demographic data for patients with COVID-19-ARDS– Unselected population

| First author                  | Country   | Date of publication | Patients receiving IMV | Age (years) Mean (SD) | Number of males | BMI (kg/m <sup>2</sup> ) | Illness Severity scores                                    |
|-------------------------------|-----------|---------------------|------------------------|-----------------------|-----------------|--------------------------|------------------------------------------------------------|
| Abu Sayf <sup>80</sup>        | USA       | 1-Oct-21            | 192                    | 66·9 (14·2)           | 120             | 32·8 (8·2)               | -                                                          |
| Baedorf Kassis <sup>103</sup> | USA       | 7-Mar-21            | 40                     | 56·6 (16·0)           | 21              | -                        | APACHE IV 110·1 (26)<br>SOFA 12 (1·5)                      |
| Bain <sup>38</sup>            | USA       | 5-Feb-21            | 27                     | 65·1 (12·5)           | 14              | 34·7 (8·1)               | Modified SOFA: 6·3 (3·1)                                   |
| Bastos <sup>29</sup>          | Brazil    | 11-Dec-20           | 18                     | -                     | -               | -                        | -                                                          |
| Bavishi <sup>39</sup>         | USA       | -                   | 54                     | 58·0 (18·5)           | 37              | -                        | SOFA: 9·2 (3·2)                                            |
| Beloncle <sup>62</sup>        | France    | -                   | 112                    | 61·9 (15·8)           | 76              | 29·4 (5·3)               | SAPS II: 47·4 (15·8)                                       |
| Blot <sup>40</sup>            | France    | 3-Nov-20            | 14                     | 66·6 (5·8)            | 11              | 28·2 (38)                | SAPS II: 26·5 (9·1)<br>SOFA: 4·4 (0·8)                     |
| Boscolo <sup>70</sup>         | Italy     | 28-Jul-21           | 241                    | 65·6 (11·2)           | 189             | 27·4 (3·7)               | SOFA: 5·7 (3·0)<br>CCI: 1·4 (0·7)                          |
| Caravita <sup>64</sup>        | Italy     | 17-Nov-20           | 21                     | 65·6 (8·0)            | 18              | 28·3 (4·8)               | -                                                          |
| Carboni Bisso <sup>41</sup>   | Argentina | 1-Jan-21            | 114                    | 67·5 (4·2)            | 75              | -                        | APACHE II: 12·4 (4·9)<br>SOFA: 3·5 (2·3)<br>CCI: 4·3 (2·5) |
| Chaudhary <sup>30</sup>       | USA       | 14-Oct-20           | 61                     | 69·3 (12·1)           | 30              | -                        | -                                                          |
| Chew <sup>42</sup>            | Singapore | 1-Oct-20            | 13                     | -                     | -               | -                        | SOFA: 6·6 (2·5)<br>APACHE II: 15·6 (10·8)                  |
| Cummings <sup>74</sup>        | USA       | -                   | 203                    | 61·6 (15·7)           | 171             | 30·8 (7·7)               | SOFA: 10·6 (3·7)                                           |
| Diehl <sup>44</sup>           | France    | 17-Jun-20           | 22                     | 64·3 (14·3)           | 19              | -                        | SAPS II: 53·6 (15·8)<br>SOFA: 9 (3·2)                      |
| Dreher <sup>45</sup>          | Germany   | 27-May-20           | 24                     | 63·4 (9·5)            | 15              | 29·4 (3·9)               | SOFA: 7·6 (2·4)                                            |
| Dupuis <sup>66</sup>          | France    | 1-Feb-21            | 117                    | 60·6 (12·8)           | 94              | 29·3 (5·6)               | SAPS II: 40·4 (15·0)<br>CCI: 1·4 (2·3)                     |
| Estenssoro <sup>8</sup>       | Argentina | -                   | 1909                   | 61·3 (13·4)           | 1294            | 29·7 (5·9)               | SOFA: 5·4 (3·7)<br>APACHE II: 15 (7·4)<br>CCI: 1·4 (0·7)   |
| Ferreira <sup>67</sup>        | Brazil    | -                   | 984                    | 60 (15)               | 895             | 27·0 (7·0)               | SAPS III: 64 (17)<br>SOFA: 14 (4)                          |
| Fogagnolo <sup>46</sup>       | Italy     | 1-Jan-21            | 15                     | 62 (11·5)             | 13              | -                        | SOFA: 6·7 (4·9)                                            |
| Gamberini <sup>75</sup>       | Italy     | 18-Dec-20           | 240                    | -                     | -               | -                        | SAPS II: 38·4 (11·2)<br>SOFA: 5 (3·0)                      |

|                                 |                                   |           |      |             |      |                |                                                                      |
|---------------------------------|-----------------------------------|-----------|------|-------------|------|----------------|----------------------------------------------------------------------|
| Gattinoni <sup>36</sup>         | Italy                             | 15-May-20 | 16   | -           | -    | -              | -                                                                    |
| Gibot <sup>35</sup>             | France                            | 22-Dec-21 | 17   | 66·1 (7·3)  | 15   | 30·8 (3·6)     | -                                                                    |
| Ibarra-Estrada <sup>57</sup>    | Mexico                            | 29-Sep-21 | 90   | 56 (15)     | 63   | -              | APACHE II: 14·8 (4·8)                                                |
| Langer <sup>76</sup>            | Italy                             | -         | 892  | 62·3 (10·4) | 831  | 28 (4·5)       | SOFA: 4 (1·5)<br>APACHE II: 10 (4·5)                                 |
| Lemmers <sup>48</sup>           | Italy                             | 1-Dec-20  | 169  | 65·3 (9·0)  | 133  | 28 (4·5)       | -                                                                    |
| Lemyze <sup>49</sup>            | France                            | 2-Dec-20  | 44   | 63 (10)     | 33   | 32·8 (6·5)     | SAPS II: 43·5 (26·1)<br>CCI: 1·4 (0·8)                               |
| Lenka <sup>33</sup>             | USA                               | 16-Nov-20 | 23   | -           | -    | -              | qSOFA: 0·6 (0·8)                                                     |
| Mahida <sup>51</sup>            | UK                                | 1-Dec-20  | 111  | 55·3 (12·0) | 84   | 30·1 (5·3)     | APACHE II: 14·7 (4·5)<br>SOFA: 8·4 (2·3)                             |
| Pan <sup>71</sup>               | China                             | 20-Jul-21 | 20   | 64 (7)      | 12   | -              | SOFA: 11 (2)                                                         |
| Puah <sup>72</sup>              | Singapore                         | 9-Sep-21  | 102  | 61·3 (10·5) | 75   | 26·6 (5·6)     | APACHE II: 15·4 (9·0)<br>SOFA: 4·4 (3·8)                             |
| Schavemaker <sup>79</sup>       | Netherlands                       | -         | 1099 | 64·6 (11·3) | 802  | 28·5 (4·6)     | -                                                                    |
| Schenck <sup>68</sup>           | USA                               | -         | 267  | 64·6 (14·9) | 193  | 29 (6·0)       | -                                                                    |
| Schmidt <sup>61</sup>           | France,<br>Belgium<br>Switzerland | 23-Nov-20 | 2635 | 62·7 (12·6) | 3141 | 28·4 (5·2)     |                                                                      |
| Torres <sup>73</sup>            | Spain                             | 13-Sep-21 | 1118 | 64·6 (11·1) | 796  | -              | APACHE II: 12·5 (4·8)<br>SOFA: 6·6 (2·2)                             |
| Wolf <sup>54</sup>              | USA                               | 3-Feb-21  | 249  | 60·4 (17·1) | 175  | -              | Modified SOFA: 6<br>(3·0)                                            |
| Yildirim <sup>55</sup>          | Turkey                            | 6-Jul-21  | 58   | 65·1 (13·4) | 40   | -              | APACHE II: 20·6<br>(10·9) SAPS II: 51·4<br>(23·0)<br>SOFA: 6·1 (3·4) |
| Zorbas <sup>69</sup>            | Australia                         | -         | 25   | 71·5 (2·0)  | 14   | 31·9<br>(13·4) | APACHE II: 17·3 (8·8)                                                |
| APACHE – SOFA, SAPS, qSOFA, CCI |                                   |           |      |             |      |                |                                                                      |

Table S6b. Demographic data for patients with COVID-19-ARDS – Selected population

| First author | Country |  |  | Age (years) |  |  | Illness Severity scores |
|--------------|---------|--|--|-------------|--|--|-------------------------|
|--------------|---------|--|--|-------------|--|--|-------------------------|

|                                 |             | Date of publication | Patients receiving IMV | Mean (SD)   | Number of males | BMI (kg/m <sup>2</sup> ) |                                                                 |
|---------------------------------|-------------|---------------------|------------------------|-------------|-----------------|--------------------------|-----------------------------------------------------------------|
| Bagate <sup>37</sup>            | France      | 5-Nov-20            | 10                     | 61.5 (17.2) | 7               | -                        | SAPS II: 38.2 (12.0)<br>SOFA: 5.3 (3.4)<br>CCI: 0.7 (1.7)       |
| Bell <sup>59</sup>              | USA         | 23-Feb-22           | 125                    | 57 (13)     | 81              | 32.4 (7.5)               | -                                                               |
| Diaz <sup>43</sup>              | Chile       | -                   | 85                     | 48 (10.6)   | 71              | -                        | SOFA: 9.6 (3.8)                                                 |
| Fanelli <sup>102</sup>          | Italy       | 5-Feb-22            | 146                    | 53.4 (8.2)  | 124             | 29.7 (5.9)               | -                                                               |
| Giraud <sup>47</sup>            | Switzerland | 2-Feb-21            | 10                     | 57 (4)      | 5               | 31.5 (5)                 | SAPS II: 56 (3)                                                 |
| Jozwiak <sup>32</sup>           | France      | 28-Dec-20           | 11                     | 48.9 (17.8) | 7               | 29.3 (5.1)               | SAPS: 66.5 (17.0)<br>SOFA: 11.9 (4.2)                           |
| Laghlam <sup>58</sup>           | France      | 1-Jul-21            | 12                     | 71.8 (8.7)  | 9               | -                        | -                                                               |
| Lang <sup>82</sup>              | Germany     | -                   | 34                     | 67 (13)     | 28              | 28 (4.6)                 | SAPS II: 46 (12)<br>SOFA: 8.9 (3.6)                             |
| Li <sup>50</sup>                | USA         | 23-Dec-20           | 43                     | -           | -               | -                        | SOFA: 9.5 (2.3)                                                 |
| Mittermaier <sup>52</sup>       | Germany     | 19-Oct-20           | 23                     | 66.7 (13.4) | 12              | 30.0 (6.5)               | APACHE II: 19.0 (9.0)<br>SOFA: 4.6 (4.0)                        |
| Park <sup>56</sup>              | South Korea | 6-Aug-21            | 23                     | 68.9 (8.7)  | 15              | 25.3 (3.6)               | APACHE II: 18.9 (10.3)<br>SAPS II: 44.9 (23.7)<br>SOFA: 8 (4.7) |
| Roldan <sup>60</sup>            | Peru        | 12-Feb-22           | 15                     | 55.2 (9.8)  | 14              | 26.6 (4.1)               | APACHE II: 13.4(4.1)                                            |
| Weiss <sup>53</sup>             | USA         | 7-Nov-20            | 42                     | 60.0 (13.4) | 29              | 34.2 (7.5)               | SOFA: 6.8 (2.5)                                                 |
| Wiles <sup>34</sup>             | USA         | 30-Dec-20           | 11                     | 68.5 (14.3) | 9               | -                        | APACHE III: 73.6 (17.3)                                         |
| APACHE – SOFA, SAPS, qSOFA, CCI |             |                     |                        |             |                 |                          |                                                                 |

**Table S7:** Ventilator parameters and respiratory variables.

| First author      | CRS<br>(ml/cmH <sub>2</sub> O) | PaO <sub>2</sub> /FiO <sub>2</sub><br>(mmHg) | PEEP<br>(cmH <sub>2</sub> O) | Tidal volume         | Plateau<br>pressure<br>(cmH <sub>2</sub> O) | Driving<br>pressure<br>(cmH <sub>2</sub> O) | PaCO <sub>2</sub><br>(mmHg) | FiO <sub>2</sub> (%) | RR (per min) | Peak<br>pressure<br>(cmH <sub>2</sub> O) |
|-------------------|--------------------------------|----------------------------------------------|------------------------------|----------------------|---------------------------------------------|---------------------------------------------|-----------------------------|----------------------|--------------|------------------------------------------|
| Abu Sayf          | 41.1 (17.9)                    | 160.8 (89.6)                                 | 12.4 (3.7)                   | 6 (1.5) mL/kg        | -                                           | 12 (4.5)                                    | 42.4 (6.7)                  | -                    | -            | -                                        |
| Baedorf<br>Kassis | 32.3 (10.5)                    | 151.7 (45.4)                                 | 13.5 (2.3)                   | 6.24 (0.69)<br>mL/kg | 25.1 (2.9)                                  | 11.7 (3.2)                                  | 48 (7.7)                    | 71.1 (20.7)          | 24.9 (5.4)   | -                                        |
| Bagate            | 29.1 (14.6)                    | 84.8 (39.9)                                  | 12.6 (4.3)                   | 6.6 (0.6) mL/kg      | 27.4 (2.58)                                 | 14.3 (3.4)                                  | 47.6 (12.9)                 | -                    | 32.6 (4.3)   | 41.6 (2.58)                              |
| Bain              | 34.8 (15.9)                    | 112.7 (59.1)                                 | -                            | -                    | -                                           | -                                           | -                           | -                    | -            | -                                        |
| Bastos            | 43.3 (11.4)                    | 271.8 (131.1)                                | 10.7 (2.4)                   | -                    | 21.6 (4.62)                                 | 10.5(2.8)                                   | -                           | -                    | -            | -                                        |
| Bavishi           | 34.8 (15.8)                    | 166.2 (109.3)                                | 11.1 (2.6)                   | -                    | -                                           | 12.5 (5.3)                                  | -                           | -                    | -            | -                                        |
| Bell              | 27.1 (8.3)                     | 114.3 (51)                                   | 12 (3)                       | 412.9 (75) ml        | 27.6 (3.8)                                  | 15.7 (4.5)                                  | 77.0 (30.0)                 | 24<br>-6             |              |                                          |
| Beloncle          | 35.4 (11.3)                    | 143.4 (60.8)                                 | 12 (3.0)                     | 6.3 (0.8) mL/kg      | 23.6 (5.3)                                  | -                                           | 38.4 (6.8)                  | 53.5 (22.5)          | 27.4 (3.8)   | -                                        |
| Blot              | 39.4 (15.2)                    | 95.3 (30.8)                                  | 11.8 (2.9)                   | 6.24 (0.74)<br>mL/kg | 22 (3.3)                                    | 10.5 (3.05)                                 | 36.5 (6.2)                  | -                    | -            | -                                        |
| Boscolo           | 49.1 (15.7)                    | 153.9 (85.0)                                 | 11.6 (2.2)                   | 7.8 (1.4) mL/kg      | 23 (4.5)                                    | 11(3.0)                                     | 44.7 (10.4)                 | 60 (14.9)            | 16.7 (4.5)   | -                                        |
| Caravita          | 32.4 (14.3)                    | 113.8 (55.7)                                 | 11 (4.8)                     | 448.4 (127.2) mL     | 26.3 (4.8)                                  | -                                           | 55.2 (18.3)                 | 70 (15.9)            | 24 (6.4)     | 28.4 (5.6)                               |
| Carboni Bisso     | 37.8 (12.8)                    | 205.3 (90.9)                                 | 10.0 (3.0)                   | 7.2 (0.4) mL/kg      | 21.6 (3.8)                                  | 11.7 (3.0)                                  | -                           | 50 (15.0)            | -            | -                                        |
| Chaudhary         | 26.7 (9.1)                     | -                                            | 7.6 (3.8)                    | -                    | 25.7 (6.1)                                  | -                                           | -                           | -                    | -            | -                                        |
| Chew              | 30.8 (6.6)                     | 193.2 (31.7)                                 | 11.7 (3.3)                   | -                    | 22.7 (3.7)                                  | 10 (3.3)                                    | -                           | 45.9 (10.4)          | -            | -                                        |
| Cummings          | 28.4 (10.5)                    | 137.8 (91.8)                                 | 15 (4.5)                     | 6.4 (1.0) mL/kg      | 27.0 (6.0)                                  | 14.6 (5.2)                                  | -                           | -                    | -            | 26.6 (6.7)                               |
| Diaz              | 22.7 (7.5)                     | 83.0 (26.8)                                  | 10.4 (4.1)                   | 5.4 (1.0) mL/kg      | 26.2 (5.2)                                  | 15.7 (3.0)                                  | 58.7 (18.3)                 | -                    | -            | -                                        |
| Diehl             | 39.1 (9.2)                     | 222.8 (103.8)                                | 16 (1.6)                     | 396.6 (54.7) mL      | 26.6 (2.4)                                  | 10.1 (2.2)                                  | 53.6 (14.3)                 | 47.9 (14.3)          | 32.1 (5.2)   | -                                        |
| Dreher            | 39.4 (15.0)                    | 119.2 (32.3)                                 | 13.4 (2.4)                   | -                    | -                                           | -                                           | -                           | 67.9 (17.3)          | -            | -                                        |
| Dupuis            | 39.3 (19.2)                    | 115.3 (56.3)                                 | 12 (3.0)                     | 6.1 (0.4) mL/kg      | 26 (4.5)                                    | -                                           | 38.7 (7.5)                  | -                    | -            | -                                        |
| Estenssoro        | 36.4 (11.1)                    | 163.2 (79.4)                                 | 10 (3.0)                     | 6.4 (0.7) mL/kg      | 23 (4.5)                                    | 12 (3.0)                                    | 47.1 (11.1)                 | 62.8 (26.0)          | 23.3 (4.5)   | -                                        |

|                |             |              |            |                  |            |            |             |             |            |            |
|----------------|-------------|--------------|------------|------------------|------------|------------|-------------|-------------|------------|------------|
| Fanelli        | 27.1 (9.7)  | 67.4 (17.9)  | 12 (2.9)   | -                | 28.6 (3.7) | 16 (4.5)   | 61.5 (17.2) | 98.2 (3.7)  | 25.7 (5.9) |            |
| Ferreira       | 32.4 (12.2) | 171 (74)     | 10 (3.0)   | 6.5 (1.3) mL/kg  | 22 (5)     | 13 (4)     | 44 (10)     | 50 (14.8)   | -          | -          |
| Fogagnolo      | 46.1 (9.0)  | 121.3 (46.6) | 13.3 (1.6) | 440 (65.4) mL    | 22.7 (1.6) | 9.3 (1.6)  | 56.3 (13.1) | -           | 19.5 (3.3) | -          |
| Gamberini      | 39.1 (11.2) | -            | 12 (3.0)   | 7.1 (1.0) mL/kg  | 24.6 (3.7) | -          | -           | -           | -          | -          |
| Gattinoni      | 50.2 (14.3) |              |            |                  |            |            |             |             |            |            |
| Gibot          | 40.4 (11.3) | 130.9 (42.0) | 11.4 (3.2) | 6.6 (0.6) mL/kg  | 23 (4.9)   | 12 (3.2)   | -           | -           | 24.4 (4.0) | -          |
| Giraud         | 33 (4)      | 180 (45)     | 11 (1)     | 420 (35) mL/kg   | 23 (1)     | -          | -           | -           | 22 (4)     | -          |
| Ibarra-Estrada | 31 (9.4)    | 144 (46)     | 14 (3.0)   | 6.5 (0.8) mL/kg  | 27.6 (2.3) | 13.8 (4.2) | -           | -           | -          | -          |
| Jozwiak        | 24.4 (13.6) | 72.0 (26.3)  | 15.1 (4.2) | 5.4 (2.0) mL/kg  | 29.7 (3.4) | 14.6 (7.6) | 58.7 (18.7) | 90.1 (22.9) | 26.5 (8.5) | -          |
| Laghlam        | 25.7 (6.2)  | 146 (48)     | 9.9 (1.0)  | 5.5 (0.5) mL/kg  | -          | 17.1 (4.3) | 52 (8.9)    | -           | 24.7 (5.1) | -          |
| Lang           | 51 (28)     | 114 (33)     | 13 (3)     | 460 (130) mL     | -          | -          | -           | 66 (19)     | -          | 28 (5)     |
| Langer         | 41.1 (12.6) | 127.4 (63.1) | 12 (3.0)   | 7.0 (1.1) mL/kg  | 24.4 (3.7) | 11.6 (3.7) | 43.7 (11.9) | 73.5 (22.3) | 21.1 (5.2) | -          |
| Lemmers        | 28 (9.0)    | 117.0 (50.1) | 12 (3.0)   | 5.9 (0.8) mL/kg  | 23 (4)     | -          | 56 (16)     | -           | -          | 30 (5)     |
| Lemyze         | 33.9 (9.3)  | 121 (42)     | 16.8 (3.8) | 6.2 (0.56) mL/kg | 29(4)      | 12.4 (3.8) | 38.4 (8.4)  | 66 (28.4)   | -          | -          |
| Lenka          | 44.7 (23.8) | 121.6 (85.3) | 16.7 (4.7) | -                | 26.5 (5.9) | 8.4 (11.1) | -           | 66.4 (23.7) | -          | -          |
| Li             | 26.1 (8.5)  | 86.7 (30.3)  | 15.1 (3.9) | -                | -          | -          | -           | 88.7 (19.9) | -          | -          |
| Mahida         | 28.7 (7.5)  | 109.9 (28.2) | 10 (3.0)   | 5.2 (1.0) mL/kg  | -          | 16.4 (3.8) | -           | 72.1 (19.5) | -          | 27 (4.5)   |
| Mittermaier    | 54.3 (15.2) | 197.9 (43)   | 20.1 (3.9) | 6.4 (0.5) mL/kg  | -          | 10.3 (3.1) | 52.4 (9.7)  | 40.0 (10.6) | 16.7 (2.4) | 30.1 (2.9) |
| Pan            | 23 (8)      | 180 (75)     | 6 (2)      | 5.6 (0.8) mL/kg  | 23 (6)     | 17 (5)     | 60 (18)     | -           | -          | -          |
| Park           | 27.3 (8.5)  | 110.6 (31.6) | 11.3 (3.2) | 6.3 (1.1) mL/kg  | -          | 13.7 (3.2) | 44.4 (7.1)  | -           | 22.4 (6.3) | -          |
| Puah           | 37.2 (13.5) | 187.6 (82.0) | 10.7 (1.5) | -                | 23(4.5)    | 11.6 (3.8) | -           | -           | -          | -          |
| Roldan         | 28.5 (8.5)  | 137.5 (36.3) | 14.5 (2.7) | 5.4 (0.6) ml/kg  | 26.8 (2.9) | 12.5 (2.4) | 65.5 (13.9) |             |            | 32.4 (3.1) |
| Schavemaker    | 33.9 (10.7) | 125.9 (47.3) | 12.8 (2.7) | 6.5 (0.9) mL/kg  | -          | 14.0 (3.2) | 44.7 (8.3)  | 57.6 (14.5) | 21.8 (3.4) | 27.9 (4.3) |
| Schenck        | 29.8 (11.2) | 106.5 (38.8) | 10 (3.0)   | 7.1 (1.5) mL/kg  | 25 (6.0)   | 14.1 (4.6) | 44.7 (10.4) | -           | -          | -          |

|          |             |              |            |                 |            |            |             |             |            |            |
|----------|-------------|--------------|------------|-----------------|------------|------------|-------------|-------------|------------|------------|
| Schmidt  | 33·7 (11·9) | 161·4 (86·8) | 12 (3·0)   | 6·2 (0·7) mL/kg | 24 (4·5)   | 13·4 (5·2) | 40·4 (8·2)  | -           | -          | -          |
| Torres   | 38·9 (15·4) | 122·6 (67·7) | 12(3·0)    | 7·2 (1·2) mL/kg | -          | 12·2 (4·0) | 44·0 (11·9) | 78·5 (29·7) | 20·7 (4·5) | 31 (5·9)   |
| Weiss    | 33·7 (11·1) | 134·3(54)    | 14·8 (1·9) | 6·1 (0·4) mL/kg | 27·7 (4·0) | -          | 51·9 (12·7) | -           | -          | -          |
| Wiles    | 38·9 (10·7) | -            | -          | -               | -          | -          | -           | -           | -          | -          |
| Wolf     | 35·5 (11·0) | 195·9 (93·4) | 10 (3·0)   | -               | 21·4 (3·7) | 11·0 (3·0) | -           | -           | -          | -          |
| Yildirim | 30·8 (11·5) | 145·1 (83·6) | 11·8 (2·7) | 7·4 (2·0) mL/kg | 16·6 (5·9) | 16·6 (5·9) | -           | -           | -          | -          |
| Zorbas   | 39·7 (17·5) | 162·3 (97)   | 9·5 (6·3)  | -               | -          | -          | -           | -           | -          | 23·8 (5·4) |



**Table S8: Secondary outcomes for COVID-19-ARDS.**

| <b>Outcome</b>          | <b>Number of studies</b> | <b>Mean (95%-CI)</b>   |
|-------------------------|--------------------------|------------------------|
| ICU mortality           | 27 studies               | 35.7% (29.4% to 42.2%) |
| Hospital mortality      | 14 studies               | 39.1% (32.6% to 45.8%) |
| 28-day mortality        | 13 studies               | 43.2% (32.6% to 54.1%) |
| Cumulative mortality    | 43 studies               | 40.3% (35.1% to 45.6%) |
| ICU Length of stay      | 25 studies               | 19 days (15 to 22)     |
| Hospital Length of stay | 17 studies               | 28 days (23 to 34)     |
| Ventilator-free days    | 7 studies                | 5.2 days (2.9 to 7.6)  |

**Table S9: Outcomes of all COVID-19-ARDS studies**

| First author   | Length of stay (days)                       | Mortality (number) | Complications (number)              | Interventions (number)                                                                                                                                       |
|----------------|---------------------------------------------|--------------------|-------------------------------------|--------------------------------------------------------------------------------------------------------------------------------------------------------------|
| Abu Sayf       | ICU: 12·6 (6·7)<br>Hospital:<br>14·6 (10·5) | 122                | -                                   | -                                                                                                                                                            |
| Baedorf Kassis | -                                           | 13                 | -                                   | PP: 19<br>Tracheostomy: 1                                                                                                                                    |
| Bagate         | -                                           | 7                  | -                                   | NMBA: 7<br>ECMO: 1                                                                                                                                           |
| Bain           | -                                           | 12                 | -                                   | PP: 19<br>NMBA: 20<br>Inhaled vasodilators:<br>5<br>ECMO: 7<br>CRRT: 7<br>CCS: 7<br>Hydroxychloroquine:<br>2<br>Remdesivir: 15<br>Convalescent plasma:<br>10 |
| Bastos         | ICU: 21·6 (27·4)<br>Hospital: 21·8 (35·0)   | -                  | -                                   | -                                                                                                                                                            |
| Bavishi        | ICU: 12·8 (8·5)<br>Hospital: 17·0 (15·5)    | 9                  | PE: 7                               | Remdesivir: 12<br>Anti-IL6 15<br>CCS: 15<br>Hydroxychloroquine:<br>5<br>VP 38<br>PP: 24<br>NMBA: 18<br>iNO: 3<br>RRT: 10<br>ECMO: 6<br>Tracheostomy: 11      |
| Bell           | -                                           | -                  | -                                   | Prone position: 125                                                                                                                                          |
| Beloncle       | -                                           | 29                 | VTE: 23 (PE: 19)                    | PP: 61<br>iNO: 14                                                                                                                                            |
| Blot           | -                                           | 3                  | VAP: 10<br>VTE: 6                   | Antibiotics: 3<br>CCS: 5<br>Hydroxychloroquine:<br>4<br>Remdesivir: 1<br>Prone: 8<br>ECMO: 0<br>VP: 9                                                        |
| Boscolo        | ICU: 16·4 (11·9)<br>Hospital: 29·6 (17·2)   | 78                 | -                                   | -                                                                                                                                                            |
| Caravita       | -                                           | 11                 | -                                   | Steroids: 15<br>Antibiotics: 15<br>Hydroxychloroquine:<br>6<br>Antiretroviral agents:<br>6<br>VP: 3                                                          |
| Carboni Bisso  | ICU: 19·5 (11·7)<br>Hospital: 26·9 (14·5)   | 46                 | VAP: 11<br>Pneumothorax: 4<br>PE: 4 | NMBA: 84<br>PP: 41<br>iNO: 12<br>ECMO: 6<br>Tracheostomy: 46<br>CCS: 99<br>Antibiotics: 98                                                                   |

|            |                                           |      |                                               |                                                                                                                                                                                |
|------------|-------------------------------------------|------|-----------------------------------------------|--------------------------------------------------------------------------------------------------------------------------------------------------------------------------------|
|            |                                           |      |                                               | Convalescent plasma: 50<br>Ritonavir/Lopinavir: 18<br>Tocilizumab: 2                                                                                                           |
| Chaudhary  | -                                         | 40   | -                                             | PP: 18                                                                                                                                                                         |
| Chew       | ICU: 20·4 (16·6)                          | 4    | Pneumothorax: 1<br>VAP: 5<br>AKI: 9<br>VTE: 2 | ECMO: 1<br>Tracheostomy: 4<br>RRT: 7<br>Lopinavir/Ritonavir: 7<br>B-interferon: 3<br>Hydroxychloroquine: 3<br>Tocilizumab: 3<br>Convalescent plasma: 2                         |
| Cummings   | -                                         | 84   | -                                             | NMBA: 51<br>iNO: 22<br>PP: 35<br>ECMO: 6<br>Tracheostomy: 17<br>VP: 170<br>RRT: 79<br>Hydroxychloroquine: 185<br>Remdesivir: 23<br>Antibiotics: 229<br>CCS: 68<br>Anti-IL6: 44 |
| Estenssoro | ICU: 17·8 (12·6)<br>Hospital: 23·4 (16·3) | 1101 | AKI: 997<br>VAP: 617<br>VTE: 170              | VP: 939<br>PP: 1176<br>RRT: 373<br>CCS: 1612<br>Convalescent plasma: 605<br>Tracheostomy: 464                                                                                  |
| Diaz       | ICU: 39·3 (27·1)<br>Hospital: 47·5 (33·9) | 33   | -                                             | PP: 78<br>NMBA: 80<br>ECMO: 82                                                                                                                                                 |
| Diehl      | -                                         |      | -                                             | -                                                                                                                                                                              |
| Dreher     | -                                         | 3    | -                                             | PP: 17<br>RRT: 11<br>Antibiotics: 20<br>ECMO: 8                                                                                                                                |
| Dupuis     | ICU: 15·4 (8·3)                           | 50   | HAP-VAP: 49                                   | Lopanavir/Ritonavir: 38<br>Hydroxychloroquine: 8<br>Tocilizumab: 9<br>Anakinra: 9<br>CCS: 31<br>PP: 82<br>iNO: 33<br>NMBA: 106                                                 |
| Estenssoro | ICU: 17·8 (12·6)<br>Hospital: 23·4 (16·3) | 1101 | AKI: 997<br>VAP: 617<br>VTE: 170              | VP: 939<br>PP: 1176<br>RRT: 373<br>CCS: 1612<br>Convalescent plasma: 605<br>Tracheostomy: 464                                                                                  |
| Fanelli    | ICU: 47·3 (41·2)<br>Hospital: 54·9 (43·4) | 78   | -                                             | Prone position: 111<br>ECMO: 146<br>iNO: 51                                                                                                                                    |
| Ferreira   | ICU: 11·4 (8·9)                           | 666  | VAP: 393                                      | PP: 427                                                                                                                                                                        |

|                |                                           |     |                               |                                                                                                                                                                                    |
|----------------|-------------------------------------------|-----|-------------------------------|------------------------------------------------------------------------------------------------------------------------------------------------------------------------------------|
|                | Hospital: 17·8 (11·1)                     |     | VTE: 279                      | Recruitment: 15<br>iNO: 2<br>ECMO: 10<br>CCS: 246<br>VP: 1095<br>RRT: 528<br>Tracheostomy: 169                                                                                     |
| Fogagnolo      | -                                         | -   | AKI: 8                        | VP: 5<br>RRT: 4                                                                                                                                                                    |
| Gamberini      | ICU: 21·8 (14·1)                          | 141 | VAP: 251                      | Tracheostomy: 224<br>RRT: 76                                                                                                                                                       |
| Gattinoni      | -                                         | -   | -                             | -                                                                                                                                                                                  |
| Gibot          | -                                         | -   | -                             | -                                                                                                                                                                                  |
| Giraud         | ICU: 25·9 (11·4)<br>Hospital: 34·7 (10·5) | 6   | -                             | ECMO: 10<br>Tracheostomy: 5<br>PP: 10                                                                                                                                              |
| Ibarra-Estrada | ICU: 12·1 (5·3)                           | 62  | Barotrauma: 8<br>VTE: 10      | Tracheostomy: 24                                                                                                                                                                   |
| Jozwiak        | -                                         | 6   | ECMO-related complications: 9 | NMBA: 11<br>iNO: 3<br>PP: 11<br>ECMO: 11                                                                                                                                           |
| Laghlam        | -                                         | 6   | -                             | Tracheostomy: 5                                                                                                                                                                    |
| Lang           | ICU: 21 (19)                              | 17  | AKI: 29<br>VAP: 6<br>VTE: 5   | Therapeutic positioning manoeuvres*: 30<br>PP: 23<br>RRT: 12<br>VP: 28<br>ECMO: 8                                                                                                  |
| Langer         | ICU: 16·4 (11·9)<br>Hospital: 30·8 (21·5) | 405 | -                             | PP: 648<br>CCS: 892                                                                                                                                                                |
| Lemmers        | ICU: 11·1 (9·7)<br>Hospital: 16·1 (11·2)  | 86  | Barotrauma: 23                | -                                                                                                                                                                                  |
| Lemyze         | -                                         | 10  | -                             | NMBA: 34<br>PP: 33<br>VP: 36<br>RRT: 16<br>Tracheostomy: 18                                                                                                                        |
| Lenka          | ICU: 10·2 (7·7)<br>Hospital: 14·8 (7·7)   | 10  | VTE: 5                        | VP: 12<br>NMBA: 9<br>IV pulmonary vasodilators: 8<br>PP: 7<br>ECMO: 3<br>Hydroxychloroquine: 19<br>L/R: 5 Remdesivir: 0<br>Tocilizumab: 3<br>Azithromycin: 19<br>CCS: 15<br>RRT: 2 |
| Li             | -                                         | 27  | -                             | ECMO: 3<br>PP: 43<br>Inhaled EPO: 43                                                                                                                                               |
| Mahida         | ICU: 17 (10·5)                            | 40  | -                             | RRT: 46<br>Tracheostomy: 55                                                                                                                                                        |
| Mittermaier    | Hospital: 56·3 (32·9)                     | 7   | -                             | PP: 9<br>ECMO: 3                                                                                                                                                                   |
| Pan            | -                                         | 12  | -                             | -                                                                                                                                                                                  |
| Park           | -                                         | 5   | -                             | PP: 23<br>iNO: 8<br>RRT: 4<br>Tracheostomy: 12                                                                                                                                     |
| Puah           | ICU: 13·4 (9·9)                           | 13  | AKI: 55                       | PP: 38                                                                                                                                                                             |

|             |                                           |     |                                                      |                                                                                                                                                |
|-------------|-------------------------------------------|-----|------------------------------------------------------|------------------------------------------------------------------------------------------------------------------------------------------------|
|             |                                           |     | Barotrauma: 5<br>VAP: 4<br>Cardiac complications: 23 | NMBA: 50<br>ECMO: 5<br>VP: 12<br>RRT: 30<br>Tracheostomy: 10                                                                                   |
| Roldan      | -                                         | 6   | -                                                    | Prone position: 15                                                                                                                             |
| Schavemaker | ICU: 19.7 (13.7)<br>Hospital: 24.9 (17.3) | 358 | VTE: 314<br>AKI: 488                                 | PP: 326<br>Recruitment manoeuvre: 20<br>ECMO: 4<br>NMBA: 297<br>Tracheostomy: 186<br>RRT: 201                                                  |
| Schenck     | -                                         | 49  | -                                                    | NMBA: 161<br>PP: 108<br>RRT: 54<br>Antibiotics: 240<br>CCS: 146<br>Toc: 28<br>VP: 254<br>Rem/Placebo: 30<br>Hydroxychloroquine: 246<br>IVIG: 6 |
| Schmidt     | ICU: 17.8 (14.1)<br>Hospital: 24.8 (20)   | 820 | VTE: 373<br>VAP: 1209                                | Tracheotomy: 198<br>PP: 1556<br>NMBA: 1966<br>iNO: 425<br>CCS: 888<br>ECMO: 235<br>RRT: 623                                                    |
| Torres      | ICU: 21.1 (15.6)<br>Hospital: 32.5 (21.5) | 419 | -                                                    | -                                                                                                                                              |
| Weiss       | -                                         | 11  | -                                                    | Remdesivir: 1<br>Toc: 18<br>Hydroxychloroquine: 40<br>Azithromycin: 37<br>CCS 35<br>ECMO: 5<br>PP: 42                                          |
| Wiles       | -                                         | -   | AKI: 11<br>VTE: 2                                    | RRT: 7<br>Tracheostomy: 1                                                                                                                      |
| Wolf        | ICU: 16.6 (11.2)                          | 72  | -                                                    | PP: 136<br>NMBA: 65<br>iNO: 48<br>RRT: 24<br>VP: 240<br>ECMO: 4<br>Tracheostomy: 71                                                            |
| Yildirim    | -                                         | -   | -                                                    | -                                                                                                                                              |
| Zorbas      | ICU: 14.2 (12.0)<br>Hospital: 24.0 (22.2) | 6   | -                                                    | Tracheostomy: 3<br>Hydroxychloroquine: 2<br>Azithromycin: 21<br>L/R: 2<br>CCS: 7<br>PP: 6<br>iNO: 6<br>iProstacyclin: 3                        |

AKI: Acute Kidney Injury, PE: Pulmonary Embolism, VAP: Ventilator-Acquired Pneumonia, VTE: Venous Thromboembolism, ECMO: Extracorporeal Membrane Oxygenation, iEPO: Inhaled Epoprostenol, iNO: Inhaled Nitric Oxide, iProstacyclin: Inhaled Prostacyclin, NMBA: Neuromuscular Blocking Agents, RM: Recruitment manoeuvre, RRT: renal replacement therapy, PP: Prone position  
\*Therapeutic positioning manoeuvres included complete proning, incomplete proning (135°), pilot's seat positioning or the use of a rotational bed

**Table S10: Sensitivity analysis based on sample size**

| <b>Sample size in the study</b> | <b>Number of studies</b> | <b>Sample size</b> | <b>CRs (95%-CI) ml/cmH<sub>2</sub>O</b> | <b>p-value</b> |
|---------------------------------|--------------------------|--------------------|-----------------------------------------|----------------|
| >100                            | 20                       | 11,187             | 35.0 (32.4 to 37.5)                     | 0.53           |
| ≤100                            | 31                       | 908                | 34.6 (31.8 to 37.3)                     |                |

**Table S11: Landmark ARDS clinical trials from the pre-COVID period**

| First Author               | Control / Intervention arm | Subgroups (n) | Mean Crs      | Inclusion criteria for PaO <sub>2</sub> /FiO <sub>2</sub> | Mean (SD) PaO <sub>2</sub> /FiO <sub>2</sub> ratio | Mean (SD) Tidal volume (mL) | Mean (SD) PEEP |
|----------------------------|----------------------------|---------------|---------------|-----------------------------------------------------------|----------------------------------------------------|-----------------------------|----------------|
| Brower RG <sup>52</sup>    | Control                    | 273           | 31 (15)       | <300                                                      | 168 (66)                                           | 6.1 (0.8)                   | 8.9 (3.5)      |
|                            | Intervention               | 276           | 39 (34)       |                                                           | 220 (89)                                           | 6.0 (0.9)                   | 14.7 (3.5)     |
| Cavalcant A <sup>53</sup>  | Control                    | 509           | 30.3 (14.4)   | <200                                                      | N/R                                                | 5.8 (1.0)                   | 12.7 (3.3)     |
|                            | Intervention               | 501           | 29.2 (12.4)   |                                                           | N/R                                                | 5.8 (1.1)                   | 12.2 (3.0)     |
| Guerin C <sup>54</sup>     | Control                    | 378           | 41 (15)       | <300                                                      | 155 (59)                                           | 8.1 (1.9)                   | 7.5 (3.2)      |
|                            | Intervention               | 413           | 40 (20)       |                                                           | 150 (59)                                           | 8.1 (2)                     | 7.9 (3.4)      |
| Guérin C <sup>55</sup>     | Control                    | 229           | 35 (15)       | <150                                                      | 100 (20)                                           | 6.1 (0.6)                   | 10 (4)         |
|                            | Intervention               | 237           | 36 (23)       |                                                           | 100 (30)                                           | 6.1 (0.6)                   | 10 (3)         |
| Hodgson C <sup>56</sup>    | Control                    | 56            | 34.17 (12.83) | <200                                                      | 122 (41)                                           | 6.0 (0.9)                   | 11.7 (3.0)     |
|                            | Intervention               | 58            | 35.18 (11.61) |                                                           | 168 (55)                                           | 5.8 (1.4)                   | 16.1 (3.6)     |
| Steinberg KP <sup>57</sup> | Control                    | 91            | 24.9 (11.7)   | <200                                                      | 126 (40)                                           | 7.4 (2.0)                   | 12.3 (4.7)     |
|                            | Intervention               | 89            | 23.3 (10.2)   |                                                           | 126 (42)                                           | 7.2 (2.1)                   | 12.9 (5.6)     |
| Mancebo J <sup>58</sup>    | Control                    | 62            | 32 (10)       | <200                                                      | 161 (94)                                           | 8.6 (1.6)                   | 12.3 (2.4)     |
|                            | Intervention               | 80            | 31 (11)       |                                                           | 132 (74)                                           | 8.3 (1.7)                   | 12.4 (1.9)     |
| Mercat A <sup>59</sup>     | Control                    | 382           | 36.1 (13.8)   | <300                                                      | 143 (57)                                           | 7.5 (1.5)                   | 7.9 (3.3)      |
|                            | Intervention               | 385           | 36.4 (14.6)   |                                                           | 155 (58)                                           | 7.4 (1.4)                   | 8.2 (3.7)      |
| Papazian L <sup>60</sup>   | Control                    | 162           | 31.9 (10.7)   | <150                                                      | 115 (41)                                           | 6.48 (0.92)                 | 9.2 (3.5)      |
|                            | Intervention               | 177           | 31.5 (11.6)   |                                                           | 106 (36)                                           | 6.55 (1.12)                 | 9.2 (3.2)      |

Cr<sub>s</sub>: static compliance of the respiratory system, PaO<sub>2</sub>: Partial pressure of oxygen, FiO<sub>2</sub>: Fraction of inspired Oxygen, PEEP: Positive end expiratory pressure, N/R: Not reported

## References

1. Abu Sayf A, Ouellette D, Fadel R. Mechanical ventilation and COVID-19: A case-control analysis of clinical characteristics, lung mechanics, and mortality. *Chest* 2021; **160**(4): A1012-A.
2. Baedorf Kassis E, Schaefer MS, Maley JH, et al. Transpulmonary pressure measurements and lung mechanics in patients with early ARDS and SARS-CoV-2. *J Crit Care* 2021; **63**: 106-12.
3. Bagate F, Tuffet S, Masi P, et al. Rescue therapy with inhaled nitric oxide and almitrine in COVID-19 patients with severe acute respiratory distress syndrome. *Ann Intensive Care* 2020; **10**(1): 151.
4. Bain W, Yang H, Shah FA, et al. COVID-19 versus Non-COVID-19 Acute Respiratory Distress Syndrome: Comparison of Demographics, Physiologic Parameters, Inflammatory Biomarkers, and Clinical Outcomes. *Ann Am Thorac Soc* 2021; **18**(7): 1202-10.
5. Bell J, William Pike C, Kreisel C, Sonti R, Cobb N. Predicting Impact of Prone Position on Oxygenation in Mechanically Ventilated Patients with COVID-19. *Journal of Intensive Care Medicine* 2022: 08850666221081757.
6. Boscolo A, Sella N, Lorenzoni G, et al. Static compliance and driving pressure are associated with ICU mortality in intubated COVID-19 ARDS. *Critical Care* 2021; **25**(1): 263.
7. Bastos GAN, Azambuja AZ, Polanczyk CA, et al. Clinical characteristics and predictors of mechanical ventilation in patients with COVID-19 hospitalized in Southern Brazil. *Rev Bras Ter Intensiva* 2020; **32**(4): 487-92.
8. Bavishi AA, Mylvaganam RJ, Agarwal R, Avery RJ, Cuttica MJ. Timing of Intubation in Coronavirus Disease 2019: A Study of Ventilator Mechanics, Imaging, Findings, and Outcomes. *Crit Care Explor* 2021; **3**(5): e0415.
9. Beloncle F, Studer A, Seegers V, et al. Longitudinal changes in compliance, oxygenation and ventilatory ratio in COVID-19 versus non-COVID-19 pulmonary acute respiratory distress syndrome. *Crit Care* 2021; **25**(1): 248.
10. Blot M, Jacquier M, Aho Glele LS, et al. CXCL10 could drive longer duration of mechanical ventilation during COVID-19 ARDS. *Crit Care* 2020; **24**(1): 632.
11. Caravita S, Baratto C, Di Marco F, et al. Haemodynamic characteristics of COVID-19 patients with acute respiratory distress syndrome requiring mechanical ventilation. An invasive assessment using right heart catheterization. *Eur J Heart Fail* 2020; **22**(12): 2228-37.
12. Carboni Bisso I, Huespe I, Lockhart C, et al. Clinical characteristics of critically ill patients with COVID-19. *Medicina (B Aires)* 2021; **81**(4): 527-35.
13. Chaudhary S, Lo KB, Matta A, Azmaiparashvili Z, Benzaquen S, Patarroyo-Aponte G. Ventilator mechanics and outcomes in critically ill patients with COVID-19 infection. *CHEST* 2020; **158**(4): A627.
14. Chew SY, Lee YS, Ghimiray D, Tan CK, Chua GS. Characteristics and Outcomes of COVID-19 Patients with Respiratory Failure Admitted to a "Pandemic Ready" Intensive Care Unit - Lessons from Singapore. *Ann Acad Med Singap* 2020; **49**(7): 434-48.
15. Cummings MJ, Baldwin MR, Abrams D, et al. Epidemiology, clinical course, and outcomes of critically ill adults with COVID-19 in New York City: a prospective cohort study. *Lancet* 2020; **395**(10239): 1763-70.
16. Diaz RA, Graf J, Zambrano JM, et al. Extracorporeal Membrane Oxygenation for COVID-19-associated Severe Acute Respiratory Distress Syndrome in Chile: A Nationwide Incidence and Cohort Study. *Am J Respir Crit Care Med* 2021; **204**(1): 34-43.
17. Diehl JL, Peron N, Chocron R, et al. Respiratory mechanics and gas exchanges in the early course of COVID-19 ARDS: a hypothesis-generating study. *Ann Intensive Care* 2020; **10**(1): 95.
18. Dreher M, Kersten A, Bickenbach J, et al. The Characteristics of 50 Hospitalized COVID-19 Patients With and Without ARDS. *Dtsch Arztebl Int* 2020; **117**(16): 271-8.
19. Dupuis C, Bouadma L, de Montmollin E, et al. Association Between Early Invasive Mechanical Ventilation and Day-60 Mortality in Acute Hypoxemic Respiratory Failure Related to Coronavirus Disease-2019 Pneumonia. *Crit Care Explor* 2021; **3**(1): e0329.
20. Estenssoro E, Loudet CI, Ríos FG, et al. Clinical characteristics and outcomes of invasively ventilated patients with COVID-19 in Argentina (SATICOVID): a prospective, multicentre cohort study. *Lancet Respir Med* 2021; **9**(9): 989-98.
21. Fanelli V, Giani M, Grasselli G, et al. Extracorporeal membrane oxygenation for COVID-19 and influenza H1N1 associated acute respiratory distress syndrome: a multicenter retrospective cohort study. *Critical Care* 2022; **26**(1): 34.
22. Ferreira JC, Ho YL, Besen B, et al. Protective ventilation and outcomes of critically ill patients with COVID-19: a cohort study. *Ann Intensive Care* 2021; **11**(1): 92.



23. Fogagnolo A, Grasso S, Dres M, et al. Focus on renal blood flow in mechanically ventilated patients with SARS-CoV-2: a prospective pilot study. *J Clin Monit Comput* 2021: 1-7.
24. Gamberini L, Tonetti T, Spadaro S, et al. Factors influencing liberation from mechanical ventilation in coronavirus disease 2019: multicenter observational study in fifteen Italian ICUs. *J Intensive Care* 2020; **8**: 80.
25. Gattinoni L, Coppola S, Cressoni M, Busana M, Rossi S, Chiumello D. COVID-19 Does Not Lead to a "Typical" Acute Respiratory Distress Syndrome. *Am J Respir Crit Care Med* 2020; **201**(10): 1299-300.
26. Gibot S, Conrad M, Courte G, Cravoisy A. Positive End-Expiratory Pressure Setting in COVID-19-Related Acute Respiratory Distress Syndrome: Comparison Between Electrical Impedance Tomography, PEEP/FiO<sub>2</sub> Tables, and Transpulmonary Pressure. *Frontiers in Medicine* 2021; **8**.
27. Giraud R, Legouis D, Assouline B, et al. Timing of VV-ECMO therapy implementation influences prognosis of COVID-19 patients. *Physiol Rep* 2021; **9**(3): e14715.
28. Ibarra-Estrada M, García-Salas Y, Mireles-Cabodevila E, et al. Use of Airway Pressure Release Ventilation in Patients With Acute Respiratory Failure Due to Coronavirus Disease 2019: Results of a Single-Center Randomized Controlled Trial. *Crit Care Med* 2021.
29. Jozwiak M, Chiche JD, Charpentier J, et al. Use of Venovenous Extracorporeal Membrane Oxygenation in Critically-Ill Patients With COVID-19. *Front Med (Lausanne)* 2020; **7**: 614569.
30. Laghnam D, Rahoual G, Malvy J, Estagnasié P, Brusset A, Squara P. Use of Almitrine and Inhaled Nitric Oxide in ARDS Due to COVID-19. *Frontiers in Medicine* 2021; **8**.
31. Lang CN, Zotzmann V, Schmid B, et al. Intensive Care Resources and 60-Day Survival of Critically-Ill COVID-19 Patients. *Cureus* 2021; **13**(2): e13210.
32. Langer T, Brioni M, Guzzardella A, et al. Prone position in intubated, mechanically ventilated patients with COVID-19: a multi-centric study of more than 1000 patients. *Critical Care* 2021; **25**(1): 128.
33. Lemmers DHL, Abu Hilal M, Bnà C, et al. Pneumomediastinum and subcutaneous emphysema in COVID-19: barotrauma or lung frailty? *ERJ Open Res* 2020; **6**(4).
34. Lemyze M, Courageux N, Maladobry T, et al. Implications of Obesity for the Management of Severe Coronavirus Disease 2019 Pneumonia. *Crit Care Med* 2020; **48**(9): e761-e7.
35. Lenka J, Chhabria MS, Sharma N, et al. Clinical characteristics and outcomes of critically ill patients with COVID-19 in a tertiary community hospital in upstate New York. *J Community Hosp Intern Med Perspect* 2020; **10**(6): 491-500.
36. Li J, Fink JB, Augustynovich AE, Mirza S, Kallet RH, Dhand R. Effects of Inhaled Epoprostenol and Prone Positioning in Intubated Coronavirus Disease 2019 Patients With Refractory Hypoxemia. *Crit Care Explor* 2020; **2**(12): e0307.
37. Mahida RY, Chotalia M, Alderman J, et al. Characterisation and outcomes of ARDS secondary to pneumonia in patients with and without SARS-CoV-2: a single-centre experience. *BMJ Open Respir Res* 2020; **7**(1).
38. Mittermaier M, Pickerodt P, Kurth F, et al. Evaluation of PEEP and prone positioning in early COVID-19 ARDS. *EClinicalMedicine* 2020; **28**: 100579.
39. Pan C, Lu C, She X, et al. Evaluation of Positive End-Expiratory Pressure Strategies in Patients With Coronavirus Disease 2019-Induced Acute Respiratory Distress Syndrome. *Front Med (Lausanne)* 2021; **8**: 637747.
40. Park J, Lee HY, Lee J, Lee SM. Effect of prone positioning on oxygenation and static respiratory system compliance in COVID-19 ARDS vs. non-COVID ARDS. *Respir Res* 2021; **22**(1): 220.
41. Puah SH, Cove ME, Phua J, et al. Association between lung compliance phenotypes and mortality in COVID-19 patients with acute respiratory distress syndrome. *Ann Acad Med Singap* 2021; **50**(9): 686-94.
42. Roldán R, Rodriguez S, Barriga F, et al. Sequential lateral positioning as a new lung recruitment maneuver: an exploratory study in early mechanically ventilated Covid-19 ARDS patients. *Ann Intensive Care* 2022; **12**(1): 13.
43. Schavemaker R, Schultz MJ, Lagrand WK, van Slobbe-Bijlsma ER, Serpa Neto A, Paulus F. Associations of Body Mass Index with Ventilation Management and Clinical Outcomes in Invasively Ventilated Patients with ARDS Related to COVID-19-Insights from the PROVENT-COVID Study. *J Clin Med* 2021; **10**(6).
44. Schenck EJ, Hoffman K, Goyal P, et al. Respiratory Mechanics and Gas Exchange in COVID-19-associated Respiratory Failure. *Ann Am Thorac Soc* 2020; **17**(9): 1158-61.
45. Clinical characteristics and day-90 outcomes of 4244 critically ill adults with COVID-19: a prospective cohort study. *Intensive Care Med* 2021; **47**(1): 60-73.
46. Torres A, Motos A, Riera J, et al. The evolution of the ventilatory ratio is a prognostic factor in mechanically ventilated COVID-19 ARDS patients. *Crit Care* 2021; **25**(1): 331.

47. Weiss TT, Cerda F, Scott JB, et al. Prone positioning for patients intubated for severe acute respiratory distress syndrome (ARDS) secondary to COVID-19: a retrospective observational cohort study. *Br J Anaesth* 2021; **126**(1): 48-55.
48. Wiles S, Mireles-Cabodevila E, Neuhofs S, Mukhopadhyay S, Reynolds JP, Hatipoğlu U. Endotracheal Tube Obstruction Among Patients Mechanically Ventilated for ARDS Due to COVID-19: A Case Series. *J Intensive Care Med* 2021; **36**(5): 604-11.
49. Wolf M, Alladina J, Navarrete-Welton A, et al. Obesity and Critical Illness in COVID-19: Respiratory Pathophysiology. *Obesity (Silver Spring)* 2021; **29**(5): 870-8.
50. ESICM LIVES 2021: Part 1. *Intensive Care Medicine Experimental* 2021; **9**(1): 51.
51. Zorbas JS, Ho KM, Litton E, Wibrow B, Fysh E, Anstey MH. Airway pressure release ventilation in mechanically ventilated patients with COVID-19: a multicenter observational study. *Acute Crit Care* 2021; **36**(2): 143-50.
52. Brower RG, Lanken PN, MacIntyre N, et al. Higher versus lower positive end-expiratory pressures in patients with the acute respiratory distress syndrome. *N Engl J Med* 2004; **351**(4): 327-36.
53. Cavalcanti AB, Suzumura É A, Laranjeira LN, et al. Effect of Lung Recruitment and Titrated Positive End-Expiratory Pressure (PEEP) vs Low PEEP on Mortality in Patients With Acute Respiratory Distress Syndrome: A Randomized Clinical Trial. *Jama* 2017; **318**(14): 1335-45.
54. Guerin C, Gaillard S, Lemasson S, et al. Effects of Systematic Prone Positioning in Hypoxemic Acute Respiratory Failure A Randomized Controlled Trial. *JAMA* 2004; **292**(19): 2379-87.
55. Guérin C, Reignier J, Richard JC, et al. Prone positioning in severe acute respiratory distress syndrome. *N Engl J Med* 2013; **368**(23): 2159-68.
56. Hodgson CL, Cooper DJ, Arabi Y, et al. Maximal Recruitment Open Lung Ventilation in Acute Respiratory Distress Syndrome (PHARLAP). A Phase II, Multicenter Randomized Controlled Clinical Trial. *Am J Respir Crit Care Med* 2019; **200**(11): 1363-72.
57. Steinberg KP, Hudson LD, Goodman RB, et al. Efficacy and safety of corticosteroids for persistent acute respiratory distress syndrome. *N Engl J Med* 2006; **354**(16): 1671-84.
58. Mancebo J, Fernández R, Blanch L, et al. A multicenter trial of prolonged prone ventilation in severe acute respiratory distress syndrome. *Am J Respir Crit Care Med* 2006; **173**(11): 1233-9.
59. Mercat A, Richard JC, Vielle B, et al. Positive end-expiratory pressure setting in adults with acute lung injury and acute respiratory distress syndrome: a randomized controlled trial. *Jama* 2008; **299**(6): 646-55.
60. Papazian L, Forel JM, Gacouin A, et al. Neuromuscular blockers in early acute respiratory distress syndrome. *N Engl J Med* 2010; **363**(12): 1107-16.
